1 **Invasive DNA elements modify nuclear architecture by *KNOT*-Linked Silencing**  
2 **in plants**

3

4

5

6 **Stefan Grob<sup>a,1</sup> and Ueli Grossniklaus<sup>a,1</sup>**

7 <sup>a</sup>Department of Plant and Microbial Biology & Zurich-Basel Plant Science Center,

8 University of Zurich, Zollikerstrasse 107, 8008 Zurich, Switzerland

9

10 <sup>1</sup>Correspondence to: [sgrob@botinst.uzh.ch](mailto:sgrob@botinst.uzh.ch), [grossnik@botinst.uzh.ch](mailto:grossnik@botinst.uzh.ch)

11

12 **Abstract:**

13 **Background:**

14 The three-dimensional (3D) organization of chromosomes is linked to epigenetic  
15 regulation and transcriptional activity. However, only few functional features of 3D  
16 chromatin architecture have been described to date. The *KNOT* is a 3D chromatin  
17 structure in *Arabidopsis*, comprising 10 interacting genomic regions termed *KNOT*  
18 *ENGAGED ELEMENTs* (*KEEs*). *KEEs* are enriched in transposable elements and  
19 small RNAs, suggesting a function in transposon biology.

20 **Results:**

21 Here, we report the *KNOT*'s involvement in regulating invasive DNA elements.  
22 Transgenes can specifically interact with the *KNOT*, leading to perturbations of 3D  
23 nuclear organization, which correlates with the transgene's expression: high *KNOT*-  
24 contact frequencies are associated with transgene silencing. *KNOT*-Linked Silencing  
25 (*KLS*) cannot readily be connected to canonical silencing mechanisms, such as RNA-  
26 directed DNA methylation and post-transcriptional gene silencing, as both cytosine  
27 methylation and small RNA abundance do not correlate with *KLS*. Furthermore, *KLS*  
28 exhibits paramutation-like behavior, as silenced transgenes can lead to the silencing  
29 of active transgenes *in trans*.

30 **Conclusion:**

31 Transgene silencing can be readily connected to a specific feature of  
32 *Arabidopsis* 3D nuclear organization, namely the *KNOT*. *KLS* likely acts either  
33 independent or prior canonical silencing mechanisms and, hence, its characterization  
34 promises to not only contribute to our understanding of chromosome folding but  
35 moreover provides valuable insight into how genomes are defended against invasive  
36 DNA elements.

37

38

39 **Keywords:**

40 3D nuclear organization, *Arabidopsis*, gene silencing, paramutation, transgene,  
41 *KNOT*

42

43 **Background**

44 Genome organization encompasses the linear genome, the epigenome, and its  
45 3-dimensional architecture (3D-genome). In contrast to the first two organizational  
46 levels, our understanding of the functional roles of the 3D-genome is rather poor.  
47 Chromosome conformation capture (3C) technologies [1] have facilitated its  
48 exploration, implicating it in transcriptional regulation [2], replication [3], and  
49 senescence [4]. We previously proposed a role of the 3D-genome in transposon  
50 biology in *Arabidopsis* [5]: Ten *KNOT ENGAGED ELEMENTS (KEEs)* (aka IHIs [6]),  
51 transposable element (TE) insertion hotspots enriched in small RNAs (sRNAs), tightly  
52 associate to form a nuclear structure termed the *KNOT* (**Fig. 1A and Additional file**  
53 **1: Table S13**). The *KNOT* is conserved in plants, found in both dicots and monocots,  
54 and a potentially analogous structure may be formed by *Drosophila* piRNA clusters  
55 [5,7].

56 Invasive DNA elements, such as TEs, retroviruses, and transgenes, are not only  
57 central to biotechnology but also play an important role in disease [8] and genome  
58 evolution [9]. Plants have evolved a balanced response to these elements, allowing for  
59 potential benefits, such as rapid adaptation to environmental challenges, through  
60 controlled mobility [10]. In contrast, their uncontrolled proliferation and expression,  
61 which can lead to genome instability and potentially harmful ectopic gene expression,  
62 respectively, is counteracted by the silencing of invasive elements. With transgenes,  
63 silencing has been observed since the beginning of their use (reviewed in Kooter et  
64 al., 1999) and is of concern to both, gene technology and fundamental research. In  
65 plants, many transgenic approaches are based on T-DNA vectors [12]. However,

66 despite their common origin, vectors used to generate transgenic plants exhibit  
67 significant differences with respect to transgene expression. Certain vectors,  
68 especially those containing viral 35S regulatory sequences [13], such as *pROK2* used  
69 to generate the insertion lines of the SALK collection [14], become more frequently  
70 silenced than others. It is unlikely that the underlying mechanism is directly associated  
71 with these transgenes, as plants must have evolved strategies to counteract invasive  
72 elements well before plant transformation was developed. Hence, although the  
73 susceptibility to silencing differs among vectors, the underlying mechanisms are likely  
74 universal irrespective of the variation with respect to silencing. The high frequency and  
75 variability of silencing among SALK lines make them an ideal system to study the  
76 control of invasive genetic elements. Suppression of such elements in plants has been  
77 associated with sRNA-mediated processes, either leading to transcript decay or DNA  
78 methylation and transcriptional silencing [13,15]. Here, we introduce an alternative  
79 silencing mechanism, *KNOT*-Linked Silencing (KLS), and show how transgenes and  
80 the 3D-genome can reciprocally influence each other.

81

## 82 **Results:**

### 83 **Ectopic 3D contacts between transgene insertion sites and the *KNOT***

84 We reanalyzed previously published Hi-C data [5] obtained from mutant plants  
85 and observed novel high-frequency long-range interactions that were absent in the wild  
86 type (**Fig. 1B**). In the *crwn1-1* mutant [16], caused by a T-DNA insertion, these novel  
87 interactions occur between the *CRWN1* locus and several *KEEs*. Additionally, we  
88 observed an enrichment of interaction frequencies between the transgene integration  
89 site (*TIS*) and constitutive heterochromatin of all five *Arabidopsis* chromosomes (**Fig.**  
90 **1B** and **Additional file 1: Figure S1A-B**).

91 We hypothesized that transgene integration can induce ectopic *KEEs* that  
92 originate from the *TIS*, resulting in novel high-frequency contacts between the *TIS* and

93 the *KNOT*. Thus, transgene integration may disturb the endogenous 3D-organization  
94 of the *TIS*. To test this, we performed 4C experiments in 8 independent, publicly  
95 available transgenic SALK lines, setting the viewpoint at the respective *TIS* (**Fig. 1C**).  
96 In parallel, we generated 4C interaction profiles of the same viewpoints in Columbia-0  
97 (Col-0) wild-type plants, and statistically evaluated differences between transgenic and  
98 wild-type 4C profiles (**Fig. 2**). Between transgenic and wild-type lines, differential  
99 interaction analysis revealed significant differences (FDR < 0.05), predominantly  
100 coinciding with *KEEs* (6 of 8 transgenic lines) (**Fig. 2**). However, the magnitude of  
101 perturbation in the 4C profile differed considerably among lines. Three of them (SG260,  
102 SG292, and SG298) exhibited a significant change in interaction frequencies only with  
103 respect to one individual *KEE* (*KEE3* for SG292 and *KEE6* for SG260 and SG298,  
104 respectively). Other transgenic lines (SG307, SG314, and SG330) showed more  
105 severe perturbations of their 4C profile. We detected ectopic high-frequency contacts  
106 with most *KEEs* and with pericentromeric regions of all chromosomes, reminiscent of  
107 the initial observation in *crwn1-1* (**Fig. 2** and **Additional file 1: Figure S1A**). Thus,  
108 transgene integration does not solely result in the insertion of additional genetic  
109 material but can also perturb the 3D-organization of the *TIS* in a specific manner. The  
110 absence of increased *TIS*-pericentromere interactions observed in SG260, SG292,  
111 and SG298 indicates that novel *TIS-KEE* interactions are not a consequence of *TIS*  
112 dislocation towards the pericentromere.

113 To assess whether the ectopic *KEE6-TIS* interactions coincide with decreased  
114 interaction frequencies between *KEE6* and other *KEEs*, we analyzed *KEE6-KNOT* and  
115 *KEE6-CRWN1* interaction frequencies in *crwn1-1* Hi-C data and other Hi-C data sets  
116 (wild-type and transgenic) [5,17], which did not exhibit ectopic *KEE6-CRWN*  
117 interactions. Indeed, *KEE6-KNOT* interaction frequencies were decreased in *crwn1-1*,  
118 suggesting that *KEE6* is partially dislocated from the *KNOT* upon contacting the  
119 transgene (**Additional file 1: Figure S1E-F**).

## 120 Number of insertions may influence the strength of *TIS-KNOT* interactions

121 To further investigate variation in the extent of 3D-genome perturbations  
122 between lines, we analyzed the number of *TIS* by Southern blotting and droplet digital  
123 PCR (ddPCR) (**Additional file 1: Table S1 and Figure S4A**). Transgenic lines  
124 exhibiting either no significant changes in interaction frequencies, or significant  
125 alterations with respect to single *KEEs* only, harbored single insertions (SG260,  
126 SG292, SG298, SG310, and SG333). All lines that exhibited more severe alterations  
127 in 3D-organization (SG307, SG314, and SG330) carried multiple insertions. PCR-  
128 based analysis using primers flanking the insertion sites indicated that multiple copies  
129 were inserted at a single locus. However, although not observed by Southern blotting,  
130 ddPCR, and short read sequencing data (4C data), we cannot completely exclude that  
131 additional T-DNA fragments are inserted elsewhere in the genome. The occurrence of  
132 large-scale rearrangements, such as translocations, can be ruled out as we can readily  
133 detect such rearrangements by 4C (**Additional file 1: Figure S4B-D**). As half of the  
134 single-insertion and all multiple-insertion lines showed high-frequency interactions with  
135 *KEEs*, transgene copy number may influence the strength but not the potential of *TIS-*  
136 *KNOT* interactions *per se*.

137

## 138 Tight *TIS-KNOT* 3D contacts coincide with transgene silencing

139 Next, we investigated whether ectopic *TIS-KEE* contacts affect the activity of  
140 the transgenes. The vector *pROK2*, used to generate the transgenic lines [14], harbors  
141 the *NPTII* kanamycin resistance gene. Thus, we visually assessed the viability of  
142 transgenic seedlings grown on medium containing kanamycin (**Fig. 3A and Additional**  
143 **file 1: Figure S2A**). The phenotypes were uniform in three distinct populations per  
144 transgenic genotype, stressing the robustness of the transcriptional state of the  
145 transgenes (**Additional file 1: Figure S2A**). Viability significantly anti-correlated with  
146 *TIS-KEE* interactions and was strongly reduced in lines with the highest *KNOT*

147 interactions, phenocopying the absence of *NPTII* in the wild type (**Fig. 3A-B**). Lines  
148 with significantly increased interaction frequencies with the *KNOT* but not the  
149 pericentromeres as well as lines without increased *KNOT* interaction frequencies were  
150 not significantly affected by kanamycin, thus showing sufficient *NPTII* expression (**Fig.**  
151 **3A**). We confirmed these results by RNA sequencing data, which revealed a significant  
152 anti-correlation between *TIS-KEE* interaction frequencies and *NPTII* expression (**Fig.**  
153 **3C**) that itself significantly correlated with viability on kanamycin (**Fig. 3D**). As the  
154 strength of *TIS-KNOT* interactions negatively correlated with *NPTII* expression, we  
155 propose an involvement of the *KNOT* in transgene silencing.

156 Interestingly, repressive genomic neighborhoods of the *TIS*s did not appear to  
157 affect either transgene expression or associated perturbations in *TIS* 3D-organization:  
158 transgenes inserted into constitutive heterochromatin (SG310 and SG333) (**Fig. 1C**)  
159 were neither silenced nor exhibited strong 3D-perturbations, whereas certain *TIS*s in  
160 euchromatin showed significant perturbations and were silenced. To corroborate this  
161 observation, we grew 99 homozygous SALK lines carrying insertions distributed along  
162 chromosome 1 on selective medium and scored their viability associated with *NPTII*  
163 expression. We did not observe decreased viability of lines that carry transgenes in  
164 repressive heterochromatin (**Fig. 3E**). Moreover, statistical analysis rejected a non-  
165 random distribution of viability scores, a finding supported by a previous study [18]. We  
166 cannot exclude that upon transformation, chromosomal localization may have  
167 influenced transgene expression, leading to counterselection of T-DNAs inserted into  
168 repressive environments. However, as they would not have been retrieved otherwise,  
169 all transgenes analyzed here were initially expressed and acquired a distinct  
170 expression state since. Hence, our results suggest that at least *de novo* silencing of  
171 transgenes is independent of the epigenetic environment of the *TIS*.

172 Furthermore, transgene silencing cannot be predicted based on wild-type  
173 interaction frequencies of a prospective *TIS* and the *KNOT*. Using Hi-C data from wild-

174 type plants [5], we did not observe a significant correlation between the interaction  
175 frequencies of the prospective *TIS* with the *KNOT* and transgene silencing (**Fig. 3F**),  
176 indicating that the 3D-organization of the prospective *TIS* does not predispose for  
177 silencing.

178 To investigate whether perturbing the 3D-organization of the *TIS* is limited to  
179 transgene expression or whether *TIS-KNOT* contacts also affect neighboring  
180 endogenous gene expression, we performed RNA sequencing. We analyzed triplicate  
181 mRNA from seven lines to test whether expression of genes surrounding the *TIS*  
182 differed between wild-type and transgenic lines, indicative of an effect of novel *TIS-*  
183 *KNOT* interactions. We found that transcriptional silencing is restricted to the  
184 transgene, as there was no enrichment of differentially expressed genes in the  
185 neighborhood of the *TIS* or the *KEEs* (**Fig. 3G** and **Additional file 1: Figure S2B**).

186 Endogenous loci evade KLS, indicating specificity to invasive genetic elements.  
187 Furthermore, although the genomic region encompassing the *TIS* and nearby genes  
188 is folded into a repressive environment, silencing is limited to the transgene itself. Thus,  
189 a perturbation of nuclear architecture alone is not sufficient to silence gene expression  
190 and other, yet to be discovered, factors may play a role in KLS specificity.

191

## 192 [Transgene silencing does not require DNA methylation](#)

193 Next, we aimed at putting KLS into the context of established silencing  
194 mechanisms in plants. There have been numerous previous reports on transgene  
195 silencing and the underlying mechanisms have been deciphered [13]. Two principle  
196 mechanisms are proposed to initiate and/or maintain transgene silencing:  
197 transcriptional gene silencing (TGS) and post-transcriptional gene silencing (PTGS)  
198 lead to transcriptional arrest and mRNA degradation, respectively [19]. Homology-  
199 dependent gene silencing, another term often used for transgene silencing, can  
200 depend on either TGS [20] or PTGS [21]. It can lead to simultaneous silencing of



201 various homologous sequences and, hence, exhibits *trans*-silencing effects [22,23].  
202 SALK T-DNA lines were found to be subjected to TGS, involving the accumulation of  
203 promoter-specific sRNAs and elevated levels of cytosine methylation (mC) in  
204 transgene promoters, mediated by the RNA-directed DNA-methylation (RdDM)  
205 pathway [23].

206 We first investigated mC levels in the nopaline synthase promoter (*nosP*) driving  
207 *NPTII* in three active (A-lines) and three silenced lines (S-lines) by Sanger sequencing  
208 after bisulfite conversion (**Fig. 4C**). In average, S-lines showed elevated mC levels and  
209 weak correlations with both, kanamycin sensitivity and *KEE* interaction frequencies  
210 (**Fig. 4C-E** and **Additional file 1: Figure S2C-F**). However, SG314, exhibiting  
211 significantly higher mC levels than all other lines, had a major effect on the statistical  
212 analysis. By omitting SG314, no significant mC enrichment in S-lines and no significant  
213 correlation between either transgene silencing or *KEE* interaction frequencies and mC  
214 levels was observed (**Fig. 4C-E**). In all transgenic lines, including SG314, the overall  
215 *nosP* mC levels were lower than expected for RdDM and comparable or below average  
216 genomic mC levels [24–27]. In summary, although one transgenic line (SG314)  
217 exhibited elevated mC levels, which may be associated with RdDM, other silenced  
218 lines (SG307 and SG330) showed low mC levels, indistinguishable from active  
219 transgenes. Therefore, mC is not necessary for the silencing of the investigated  
220 transgenes and we conclude that mC-dependent TGS, such as RdDM, is not a  
221 prerequisite for KLS. Consistent with these results, mC-independent transcriptional  
222 gene silencing has previously been reported [28].

### 223 [sRNA abundance does not correlate with KLS](#)

224 To assess a possible involvement of sRNAs in KLS, we conducted sRNA  
225 sequencing (sRNA-seq). First, we analyzed the abundance of sRNAs mapping to the  
226 *pROK2* transgene. In case of a significant involvement of sRNAs in silencing the  
227 investigated transgenes and, thus, KLS, we expected to find high levels of associated

228 sRNAs in S-lines and low levels in A-lines. We detected sRNAs associated with  
229 *pROK2* in all transgenic lines, although to variable extents (**Fig. 4F** and **Additional file**  
230 **1: Figure S3B**). In accordance with our DNA methylation analysis, sRNAs were  
231 abundant in SG314, yet, no general correlation between sRNA levels and transgene  
232 silencing was found. By normalization of sRNA reads to transgene copy number, an  
233 A-line (SG298) even exhibits the highest abundance of sRNAs in all analyzed lines  
234 (**Additional file 1: Figure S3B**). Additionally, both the silenced lines SG330 and  
235 SG307 showed indistinguishable sRNA levels from A-lines (SG260, SG292, SG310).  
236 We conclude that sRNAs are neither sufficient nor necessary to silence these  
237 transgenes. In summary, our findings suggest that neither DNA methylation nor sRNAs  
238 play a primary role in silencing the investigated transgenes and that KLS does not  
239 depend on RdDM-related TGS.

240 To perform a genome-wide analysis of sRNA abundance in the investigated  
241 lines, sRNA reads were binned to 500 bp genomic regions and subsequently analyzed  
242 to detect loci of differential sRNA association (**Additional file 1: Figure S3A**). The  
243 sRNA profiles of active and silenced transgenic lines were very similar, identifying only  
244 few distinct differential loci (**Fig. 3H**). An analysis of genomic features overlapping the  
245 identified differential loci did not reveal obvious candidate factors involved in transgene  
246 silencing. We subsequently compared the identified differential sRNA loci with  
247 differentially expressed genes obtained from the mRNA-seq experiment using the  
248 same contrast (active vs. silenced transgenic lines) and no overlap between the two  
249 data sets was found. Similarly, analysis of the differentially expressed genes of this  
250 contrast did not provide candidates associated with transgene silencing. Our results  
251 suggest that sRNAs do not appear to be directly involved in silencing the investigated  
252 transgenes.

253 By performing an alternative experiment, we aimed to independently confirm  
254 that sRNAs are not a prerequisite of KLS. Specifically, we used a genetic approach to

255 test whether PTGS is involved in KLS. As PTGS involves sRNAs that lead to mRNA  
256 decay, it can silence genes in *trans*. Thus, the progeny of a cross between an S- and  
257 an A-line should be at least partially silenced, as transgenes identical in sequence are  
258 present in both parental lines, such that mRNA from both transgenes should be  
259 affected by the same sRNAs. We performed reciprocal crosses using seven parental  
260 lines: one wild-type, three S- (SG307, SG314, SG330), and three A-lines (SG292,  
261 SG298, SG310) (**Fig. 4A**). This resulted in 8 progeny groups, either derived from two  
262 S-lines (SS), two A-lines (AA), two groups of progenies with parents of converse  
263 transcriptional state (SA and AS), and 4 groups of hemizygous transgenic progeny.  
264 We assessed their viability reflecting *NPTII* expression by growing F1 seedlings on  
265 selective medium and measuring the area and mean green fraction intensity of imaging  
266 data (**Fig. 4A-B**). The transgene expression state behaved as a heritable dominant  
267 trait (**Fig. 4A**). SS progeny, lacking *NPTII* expression, exhibited significantly reduced  
268 viability compared to all other groups, whereas as SA, AS, and AA groups did not  
269 significantly differ from each other (**Fig. 4B**). Thus, in F1 seedlings, KLS behaves as a  
270 recessive trait with Mendelian inheritance. This excludes the involvement of diffusible  
271 sRNAs acting in *trans*, suggesting that PTGS is unlikely involved in KLS.

#### 272 [KLS shows paramutation-like features](#)

273 To assess whether the F2 generation also follows Mendelian segregation, we  
274 cultivated progeny of the above-described crosses on non-selective medium and  
275 allowed four plants of each F1 population to self-fertilize. We then analyzed the  
276 segregation in response to kanamycin in the F2 seedling populations. Assuming  
277 Mendelian segregation, double hemizygous F1 plants containing a silenced and active  
278 *NPTII* transgene are expected to produce 25% kanamycin-sensitive offspring  
279 (**Additional file 1: Figure S3E**). Employing PCR-based genotyping, we could confirm  
280 genetic Mendelian segregation for both transgenes (**Additional file 1: Table S9**).  
281 However, phenotypically we observed a deviation from Mendelian segregation in a

282 large fraction of the F2 populations, manifested in significantly higher proportions (up  
283 to 92%) of kanamycin-sensitive seedlings (**Fig. 4G and Additional file 1: Figure**  
284 **S3C**). The observed phenotypic segregation distortion indicates that a large fraction of  
285 parentally active transgenes underwent *de novo* silencing, a process reminiscent of  
286 paramutation [29]. In support of our observation, *trans*-silencing between transgenes  
287 has been observed before [22,23]. Importantly, during the entire crossing procedure,  
288 the *trans*-silencing effect depends on the initial presence of a silenced transgene, as  
289 F2 seedling populations derived from AA crosses did not exhibit *trans*-silencing  
290 phenotypes (**Fig. 4G**). However, genotyping and subsequent quantification of *NPTII*  
291 transcripts by ddPCR of single F2 plants revealed that the presence of the  
292 paramutagenic allele is not necessary for the paramutagenic effect in the F2  
293 generation, as plants derived from AS crosses, which were homozygous for the A but  
294 lacking the S transgene, still exhibited full *NPTII* silencing (**Additional file 1: Figure**  
295 **S3D**). The observed proportions of silencing also exclude a potential dosage effect of  
296 diffusible sRNAs associated with post-transcriptional gene silencing that are produced  
297 by the parentally silenced transgene (**Additional file 1: Figure S3E-F**). In summary,  
298 transgenes silenced by KLS show a paramutation-like behavior, but their initial  
299 silencing is not correlated with mC and sRNAs targeting the transgene, indicating a  
300 novel mechanism depending on 3D-genome interactions.

301

## 302 **Discussion:**

### 303 [The \*KNOT\* is a novel player of the genome's defense system](#)

304 Our results suggest that insertion of transgenes has more profound effects on  
305 genome structure than previously anticipated, as not only genetic material is added,  
306 but also the 3D-architecture of the *TIS* can be severely perturbed. These alterations  
307 have a profound impact on the transgenes themselves, as architectural perturbations  
308 can clearly be associated with the expression state of the transgenes. Importantly, the

309 observed perturbations are not random. Moreover, we detected specific ectopic  
310 interactions with the *KNOT*, suggesting its involvement in the nuclear defense system  
311 against invasive genetic elements.

### 312 [KLS does not depend on canonical silencing pathways](#)

313 In our studies on the nature of KLS, we could not find strong evidence for an  
314 involvement of either PTGS or canonical TGS, suggesting that KLS is at least initially  
315 independent of these silencing mechanisms. In support, a previous study showed that  
316 the number of *KEEs* is not reduced in mutants leading to the de-repression of silenced  
317 genes [6]. The epigenetic marks affected in these mutants include repressive histone  
318 modifications, such as H3K27me3 (*clf;swn* double mutant) and H3K9me2  
319 (*suvh4;suvh5;suvh6* triple mutant), DNA methylation (*ddm1, met1, cmt3*), and  
320 epigenetic processes affecting silencing by other means (*mom1*). This suggests that  
321 epigenetic marks commonly associated with gene silencing, such as H3K9me2,  
322 H3K27me3, and mC, are not necessary for interactions among *KEEs*. Hence, an  
323 involvement of these canonical repressive marks in the recruitment of T-DNAs to the  
324 *KNOT*, thereby initiating KLS, is unlikely. Interestingly, in many of these mutants an  
325 identical set of ectopic *KEEs* can be observed in apparently pre-defined positions,  
326 which show a significant enrichment of *VANDAL6* and *ATLANTYS3* TEs, both of which  
327 are highly enriched in the ten canonical *KEEs* (**Additional file 1: Figure S3G**). This  
328 finding suggests that inactive *KEE* regions exist in the genome, whose functional  
329 activation may rely on active transcription of TEs.

### 330 [KLS is a dynamic process](#)

331 We observed that *TIS-KNOT* interactions alone are insufficient for transgene  
332 silencing, which only occurs in lines that also acquired high-frequency *TIS*-  
333 pericentromere interactions. We hypothesize that *TIS-KNOT* interactions may initiate  
334 transgene silencing, which could then be followed by a secondary alteration of the *TIS*'  
335 3D-organization, leading to a tight association with constitutive heterochromatin and

336 complete silencing of the transgene. Although not yet observed at the time of writing,  
337 continuous growing of lines showing exclusively *TIS-KNOT* interactions, such as  
338 SG298 and SG260, over several generations may corroborate this hypothesis.

339 KLS shows a paramutation-like behavior, whereby the transcriptional state of  
340 one transgene can be transferred to another. The KLS *trans*-silencing activity differs  
341 from classical paramutation, as it affects non-homologous loci and seems to depend  
342 on passage through an additional generation, the latter having also been observed for  
343 other transgenes with paramutation-like behavior [30]. Furthermore, the maintenance  
344 of the repressed paramutated state in maize requires factors involved in the biogenesis  
345 of 24 nt long sRNAs, which are homologous to components of the RdDM pathway in  
346 *Arabidopsis* [31]. Similarly, sRNAs have previously been implicated in homology-  
347 dependent *trans*-silencing in *Arabidopsis* [22,23]. In contrast to these findings, sRNAs  
348 do not seem to play a determining role in KLS, making their involvement in KLS-related  
349 *trans*-silencing unlikely.

350 Transgene silencing represents an acquired epigenetic state, which is stably  
351 inherited over subsequent generations. All the transgenic lines analyzed here initially  
352 exhibited active *NPTII* transcription [14]; hence, KLS is a dynamic process, potentially  
353 established and augmented over consecutive generations. Previous reports on  
354 transgenerational epigenetic inheritance implicated DNA methylation in this process  
355 [32,33]. Our results suggest an independent role for 3D-genome organization in the  
356 transgenerational epigenetic inheritance of silenced transgenes. Although we  
357 observed tight *TIS-KEE* interactions stably over subsequent generations, we also show  
358 that KLS may contribute to the plasticity of transgenerational epigenetic inheritance  
359 through a paramutation-like *trans*-silencing mechanism.

360 **Molecular mechanism of KLS remains to be deciphered**

361 Very likely, KLS involves a set of protein cofactors that mediate 3D *TIS-KEE*  
362 interactions. The identification of these cofactors will be essential for a better

363 understanding of KLS and its embedding within other nuclear processes. However,  
364 this search will be challenging due to the technical inaccessibility of KLS phenotypes,  
365 such as *TIS-KEE* interactions, for large-scale genetic screening.

366 KLS represents a previously uncharacterized mechanism to defend the genome  
367 against invasive DNA elements. Hence, KLS is not only important for a basic  
368 understanding of gene regulation in the context of the 3D-genome but is also of great  
369 interest to plant biotechnology, as transgene integration may have a larger impact on  
370 genome architecture than previously thought.

### 371 **Conclusions**

372 Mobile invasive DNA elements can threaten proper genome function. Hence,  
373 their transcription is regulated and can be shut down by cellular processes known as  
374 gene silencing mechanisms. We here present a novel aspect of gene silencing, which  
375 is linked to the *KNOT*, a specific 3D-chromosomal structure. Our results suggest a  
376 functional role of 3D-genome folding in the defense against invasive elements. KLS  
377 appears to be independent of previously published silencing mechanism, whose  
378 hallmarks are increased DNA methylation and RNA interference. In fact, KLS may  
379 even underlie these silencing mechanisms. Interestingly, the *KNOT* is conserved within  
380 the plant kingdom; thus, KLS may represent a basal silencing mechanism common to  
381 most plants.

382

### 383 **Methods:**

384 Detailed description on experimental procedures, materials used, and statistical  
385 analysis are available in **Supplemental Materials**.

386

387

388



389

390 **List of abbreviations:**

|     |               |                                          |
|-----|---------------|------------------------------------------|
| 391 | <i>KEE</i> :  | <i>KNOT</i> engaged elements             |
| 392 | 3D:           | three-dimensional                        |
| 393 | sRNA:         | small RNA                                |
| 394 | KLS:          | <i>KNOT</i> -linked silencing            |
| 395 | TE:           | transposable element                     |
| 396 | TGS:          | transcriptional gene silencing           |
| 397 | PTGS:         | post-transcriptional gene silencing      |
| 398 | RdDM:         | RNA-dependent DNA methylation            |
| 399 | IF:           | interaction frequency                    |
| 400 | TIS:          | transgene insertion site                 |
| 401 | mC:           | methyl cytosine                          |
| 402 | A-line:       | active transgenic line                   |
| 403 | S-line:       | silenced transgenic line                 |
| 404 | sRNA-seq:     | sRNA sequencing                          |
| 405 | <i>nosP</i> : | nopaline synthase promotor               |
| 406 | ddPCR:        | droplet digital PCR                      |
| 407 | 4C:           | circular chromosome conformation capture |

408

409 **Declarations:**

410 *Availability of data and material:*

411 4C and RNA, and sRNA sequencing data are publicly available at the Short  
412 Read Archive (SRA; <https://www.ncbi.nlm.nih.gov/sra/>) under accession SRP126992.  
413 Codes for data processing and analysis are available upon request.

414

415 *Competing interests:*



416           The authors declare no competing financial interests.

417

418   *Funding:*

419           This work was supported by the University of Zurich and an Advanced Grant  
420 of the European Research Council (MEDEA-250358) to U.G.

421

422   *Authors' contributions:*

423           S.G and U.G. conceived the study; S.G. designed and performed the  
424 experiments, analyzed the data, and wrote the manuscript; U.G. acquired funding  
425 and helped with data interpretation and writing of the manuscript.

426

427   *Acknowledgements:*

428           We thank F. Fiscalini for help with genotyping, V. Gagliardini for setting up  
429 ddPCR assays, A. Hermann for help with crosses, A. Sarazin for advice on sRNA-seq,  
430 C. Eichenberger, A. Bolaños, D. Guthörl, A. Frey, and P. Kopf for general laboratory  
431 support, P. Jullien for viability scoring, and P. Jullien, J. Vermeer, Ö. Kartal, H. Vogler,  
432 and M. Schmid for valuable input on the manuscript.

433

434 **References:**

- 435 1. Schmitt AD, Hu M, Ren B. Genome-wide mapping and analysis of chromosome  
436 architecture. *Nat Rev Mol Cell Biol.* 2016;17:743–55.
- 437 2. Gorkin DU, Leung D, Ren B. The 3D Genome in rranscriptional Regulation and  
438 pluripotency. *Stem Cell.* 2014;14:762–75.
- 439 3. Pope BD, Ryba T, Dileep V, Yue F, Wu W, Denas O, et al. Topologically  
440 associating domains are stable units of replication-timing regulation. *Nature.*  
441 2014;515:402–5.
- 442 4. Pombo A, Dillon N. Three-dimensional genome architecture: players and  
443 mechanisms. *Nat Rev Mol Cell Biol.* 2015;16:245–57.
- 444 5. Grob S, Schmid MW, Grossniklaus U. Hi-C analysis in *Arabidopsis* identifies the  
445 *KNOT*, a structure with similarities to the flamenco locus of *Drosophila*. *Mol Cell.*  
446 2014;55:678–93.
- 447 6. Feng S, Cokus SJ, Schubert V, Zhai J, Pellegrini M, Jacobsen SE. Genome-wide  
448 Hi-C analyses in wild-type and mutants reveal high-resolution chromatin interactions  
449 in *Arabidopsis*. *Mol Cell.* 2014;55:694–707.
- 450 7. Dong Q, Li N, Li X, Yuan Z, Xie D, Wang X, et al. Genome-wide Hi-C analysis  
451 reveals extensive hierarchical chromatin interactions in rice. *Plant J.* 2018;94:1141–  
452 56.
- 453 8. Hancks DC, Kazazian HH. Roles for retrotransposon insertions in human disease.  
454 *Mob DNA.* 2016;7:1–28.
- 455 9. Feschotte C, Pritham EJ. DNA transposons and the evolution of eukaryotic  
456 genomes. *Annu Rev Genet.* 2007;41:331–68.
- 457 10. Ito H, Kakutani T. Control of transposable elements in *Arabidopsis thaliana*.  
458 *Chromosom Res.* 2014;22:217–23.
- 459 11. Kooter JM, Matzke MA, Meyer P. Listening to the silent genes: transgene  
460 silencing, gene regulation and pathogen control. *Trends Plant Sci.* 1999;4:340–7.
- 461 12. Zupan JR, Zambryski P. Transfer of T-DNA from *Agrobacterium* to the plant cell.  
462 *Plant Physiol.* 1995;104:1–7.
- 463 13. Vaucheret H, Fagard M. Transcriptional gene silencing in plants: targets,  
464 inducers and regulators. *Trends Genet.* 2001;17:29–35.
- 465 14. Alonso JM, Stepanova AN, Leisse TJ, Kim CJ, Chen H, Shinn P, et al. Genome-  
466 wide insertional mutagenesis of *Arabidopsis thaliana*. *Science.* 2003;301:653–7.
- 467 15. Borges F, Martienssen RA. The expanding world of small RNAs in plants. *Nat*  
468 *Rev Mol Cell Biol.* 2015;16:727–41.
- 469 16. Dittmer TA, Stacey NJ, Sugimoto-Shirasu K, Richards EJ. LITTLE NUCLEI genes  
470 affecting nuclear morphology in *Arabidopsis thaliana*. *Plant Cell.* 2007;19:2793–803.
- 471 17. Moissiard G, Cokus SJ, Cary J, Feng S, Billi AC, Stroud H, et al. MORC family  
472 ATPases required for heterochromatin condensation and gene silencing. *Science*  
473 2012;336:1448–51.
- 474 18. Schubert D, Lechtenberg B, Forsbach A, Gils M, Bahadur S, Schmidt R.  
475 Silencing in *Arabidopsis* T-DNA transformants: The predominant role of a gene-  
476 specific RNA sensing mechanism versus position effects. *Plant Cell.* 2004;16:2561–  
477 72.

- 478 19. Rajeevkumar S, Anunanthini P, Sathishkumar R. Epigenetic silencing in  
479 transgenic plants. *Front Plant Sci.* 2015;6:524–8.
- 480 20. Matzke MA, Primig M, Trnovsky J, Matzke AJM. Reversible methylation and  
481 inactivation of marker genes in sequentially transformed tobacco plants. *EMBO J.*  
482 1989;8:643–9.
- 483 21. Jauvion V, Rivard M, Bouteiller N, Elmayan T, Vaucheret H. RDR2 partially  
484 antagonizes the production of RDR6-dependent siRNA in sense transgene-mediated  
485 PTGS. *PLoS One.* 2012;7:7–11.
- 486 22. Daxinger L, Hunter B, Sheikh M, Jauvion V, Gasciolli V, Vaucheret H, et al.  
487 Unexpected silencing effects from T-DNA tags in *Arabidopsis*. *Trends Plant Sci.*  
488 2008;13:4–6.
- 489 23. Mlotshwa S, Pruss GJ, Gao Z, Mgutshini NL, Li J, Chen X, et al. Transcriptional  
490 silencing induced by *Arabidopsis* T-DNA mutants is associated with 35S promoter  
491 siRNAs and requires genes involved in siRNA-mediated chromatin silencing. *Plant J.*  
492 2010;64:699–704.
- 493 24. Kanno T, Bucher E, Daxinger L, Huettel B, Böhmendorfer G, Gregor W, et al. A  
494 structural-maintenance-of-chromosomes hinge domain-containing protein is required  
495 for RNA-directed DNA methylation. *Nat Genet.* 2008;40:670–5.
- 496 25. Greaves IK, Groszmann M, Wang A, Peacock WJ, Dennis ES. Inheritance of  
497 trans chromosomal methylation patterns from *Arabidopsis* F1 hybrids. *Proc Natl Acad*  
498 *Sci.* 2014;111:2017–22.
- 499 26. Lister R, O'Malley RC, Tonti-Filippini J, Gregory BD, Berry CC, Millar AH, et al.  
500 Highly integrated single-base resolution maps of the epigenome in *Arabidopsis*. *Cell.*  
501 2008;133:523–36.
- 502 27. Aufsatz W, Mette MF, Matzke AJM, Matzke M. The role of MET1 in RNA-directed  
503 de novo and maintenance methylation of CG dinucleotides. *Plant Mol Biol.*  
504 2004;54:793–804.
- 505 28. Diéguez MJ, Vaucheret H, Paszkowski J, Mittelsten Scheid O. Cytosine  
506 methylation at CG and CNG sites is not a prerequisite for the initiation of  
507 transcriptional gene silencing in plants, but it is required for its maintenance. *Mol Gen*  
508 *Genet.* 1998;259:207–15.
- 509 29. Hollick JB. Paramutation and related phenomena in diverse species. *Nat Rev*  
510 *Genet.* 2016;18:5–23.
- 511 30. Mittelsten Scheid O, Afsar K, Paszkowski J. Formation of stable epialleles and  
512 their paramutation-like interaction in tetraploid *Arabidopsis thaliana*. *Nat Genet.*  
513 2003;34:450–4.
- 514 31. Giacobelli BJ, Hollick JB. Trans-homolog interactions facilitating paramutation in  
515 Maize. *Plant Physiol.* 2015;168:1226–36.
- 516 32. Mirouze M, Reinders J, Bucher E, Nishimura T, Schneeberger K, Ossowski S, et al.  
517 Selective epigenetic control of retrotransposition in *Arabidopsis*. *Nature.*  
518 2009;461:427–30.
- 519 33. Heard E, Martienssen RA. Transgenerational epigenetic inheritance: Myths and  
520 mechanisms. *Cell.* 2014;157:95–109.
- 521 34. Sequeira-Mendes J, Aragüez I, Peiró R, Mendez-Giraldez R, Zhang X, Jacobsen  
522 SE, et al. The functional topography of the *Arabidopsis* genome is organized in a  
523 reduced number of linear motifs of chromatin states. *Plant Cell.* 2014;26:2351–66.

524 **Figure Legends:**

525

526 **Fig. 1** Novel *KNOT*-interactions in transgenic plants. **a)** Hi-C interactome of  
527 *Arabidopsis thaliana*. The *KNOT* is represented by network of long-range *cis*- and  
528 *trans*-contacts found between all *Arabidopsis* chromosomes (see also **Additional file**  
529 **1: Table S13**). **b)** Hi-C interaction data representing interaction frequencies (IFs)  
530 between genomic regions on Chromosome 1 (Chr1) (*TIS*<sub>SALK T-DNA</sub>, Chr1: 25151270 –  
531 25156323) and Chr3 (*KEE6*, 22560488 – 22580488). Ectopic IFs can be observed  
532 between the *TIS* and *KEE6*. IFs are pooled into 50 kb genomic bins (see also  
533 **Additional file 1: Figure S1A**). **c)** Representation of *TIS*s on Chr1 investigated in this  
534 study. Gene and transposon density are shown to facilitate the distinction of  
535 euchromatic and heterochromatic regions.

536

537 **Fig. 2.** *TIS*s interact with *KEEs* and pericentromeric regions. Differential analysis of 4C  
538 interactomes, including 3 wild-type and 3 transgenic 4C samples. Log<sub>2</sub> fold changes  
539 (FC) are plotted. Grey: non-significant FC (FDR > 0.05). Red: significant FC (FDR ≤  
540 0.05). Orange triangles indicate viewpoints (adjacent to *TIS* on endogenous  
541 sequence). Blue triangles and dashed blue lines indicate positions of *KEEs*. Grey  
542 rectangles delineate pericentromeric regions. Interaction frequencies of single *HindIII*  
543 restriction fragments were pooled into 100 kb genomic bins. Yellow arrows indicate  
544 significant *TIS-KEE* contacts, for which magnification is given on the left.

545

546 **Fig. 3.** Transgene silencing by *KNOT*-mediated silencing. **a)** Seedlings growing on  
547 medium containing kanamycin show variable resistance (see also Additional file 1:  
548 **Figure S2A**). **b)** Pearson's correlation between phenotypically assessed viability in  
549 presence of kanamycin and *TIS* IFs with *KEEs* and pericentromeres. **c)** Pearson's  
550 correlation between *NPTII* transgene expression and *TIS* IFs with *KEEs* and

551 pericentromeres. **d)** Pearson's correlation between *NPTII* transgene expression and  
552 phenotypically assessed kanamycin resistance. **e)** Viability score (10 - fully viable, 0 -  
553 dead) of transgenic seedling populations (n = 30) grown on selective medium.  
554 Transgenic lines were selected by randomly choosing a homozygous SALK line  
555 ([www.signal.salk.edu/cgi-bin/homozygots.cgi](http://www.signal.salk.edu/cgi-bin/homozygots.cgi)) for each 300 kb genomic bin on Chr1.  
556 Numbers of transposons are indicated as a proxy for the presence of heterochromatin.  
557 Euchromatic and heterochromatic regions (purple and light red) correspond to  
558 chromatin states 1-7 and chromatin states 8-9, respectively, as previously defined [34].  
559 **f)** Pearson's correlation analysis of IFs between the prospective *TIS* and the *KNOT* in  
560 the wild type and the viability score of transgenic lines with insertions at the respective  
561 *TIS*. *TIS-KNOT* IFs were calculated from Col-0 wild-type Hi-C matrices (100 kb bins)  
562 [5]. **g)** Differentially expressed genes between Col-0 wild-type and combined  
563 expression data of all transgenic lines. For each line RNA sequencing was performed  
564 in triplicate (see also **Additional file 1: Figure S2B**). **h)** Differential analysis of sRNA-  
565 seq data. Genomic bins (500 bp) exhibiting significant changes ( $\log_{2}FC > 2$ ;  $FDR <$   
566  $0.01$ ) between S- and A-lines (see also **Additional file 1: Figure S3A**).

567

568 **Fig. 4.** KLS is independent of canonical silencing pathways. **a)** Reciprocal crosses  
569 between silenced and active transgenic lines. Images were acquired from 14-day-old  
570 seedlings. **b)** Area and mean "green" value were assessed by ImageJ. Student's *t*-  
571 tests were performed to assess significant differences between all quarters (SS, AA,  
572 AS, SA) of the diallel cross ( $FDR_{SSvsAA} = 2.7 \times 10^{-7}$ ,  $FDR_{SSvsSA} = 1 \times 10^{-8}$ ,  $FDR_{SSvsAS} =$   
573  $1 \times 10^{-8}$ ,  $FDR_{AAvsSA} = 0.87$ ,  $FDR_{AAvsAS} = 0.88$ ,  $FDR_{SAvsAS} = 0.47$ ) (**Additional file 1: Table**  
574 **S6**). **c)** Bisulfite Sanger sequencing of *nosP* (301 bp on 3'-end). Methylation levels in  
575 all contexts significantly differed between active and silenced lines and also between  
576 individual lines (**Additional file 1: Table S4, Figure S2C-F**). Error bars: Wilson 95%  
577 confidence intervals. **d)** Pearson's correlation analysis between 4C IFs with *KEEs* and

578 pericentromeres (*KEE-IF*) and *nosP* methylation levels. Weak correlation was  
579 observed (red line). Non-significant correlation was observed when the highest  
580 methylated line (SG314) is omitted (blue line). **e)** Correlation between kanamycin  
581 resistance phenotype and *nosP* methylation levels. Weak correlation was observed  
582 (red line). Non-significant correlation was observed when SG314 was omitted (blue  
583 line). **f)** Percentage of 21nt and 24nt sRNA-seq reads found within *pROK2*. For each  
584 genotype, biological triplicates were assessed (number of reads were normalized by  
585 transgene copy number) (**Additional file 1: Table S1**). **g)** Segregation in F2 seedlings.  
586 Chi-square tests were performed to test for deviation from Mendelian segregation  
587 (Null-hypothesis: 0.25/0.75 (sensitive/resistant), \*  $0.05 > P \geq 0.01$ , \*\*  $0.01 > P \geq 0.001$ ,  
588 \*\*\*  $P < 0.001$ ). Confidence interval indicates the range, in which Mendelian segregation  
589 cannot be rejected. Bars with black triangles stem from pooled data of 4 individual F1  
590 siblings (n = up to 4 x 52 seedlings), non-marked bars stem from mixed seeds of the 4  
591 siblings (n = up to 52 seedlings). Grey bars: data not available (**Additional file 1: Table**  
592 **S7, Table S8, Figure S3C**).

**Fig. 1****a**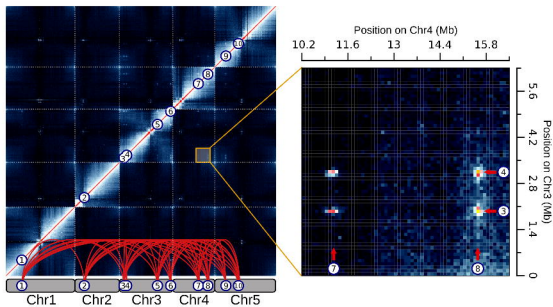**b**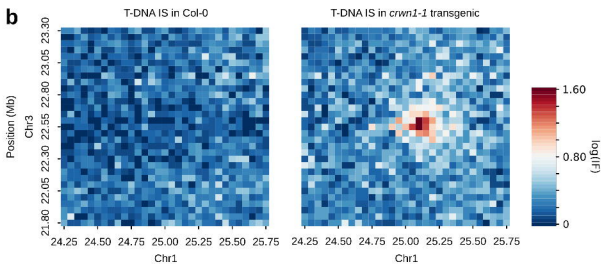**c**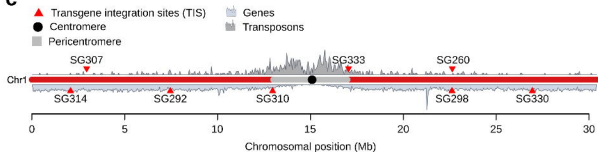



**Fig. 2**

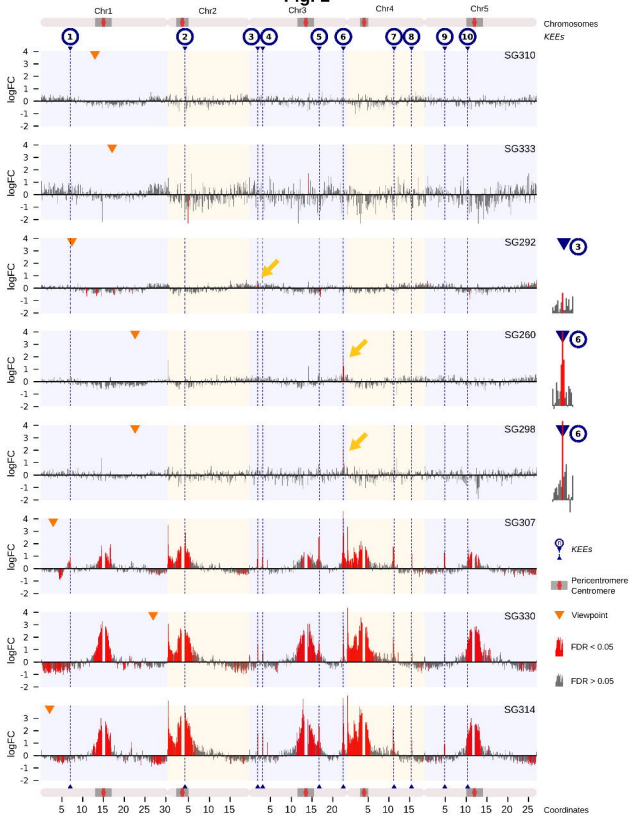



**Fig. 3**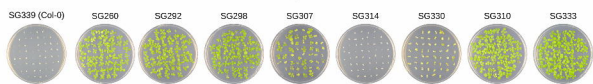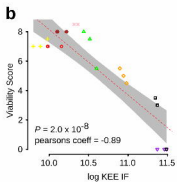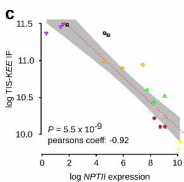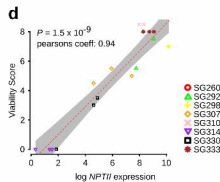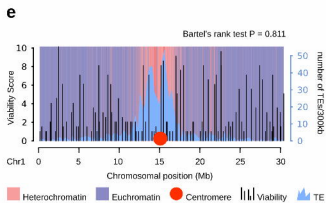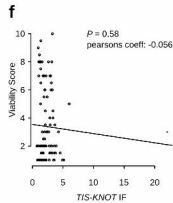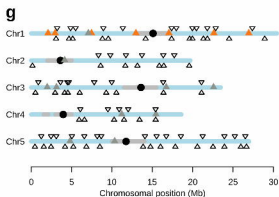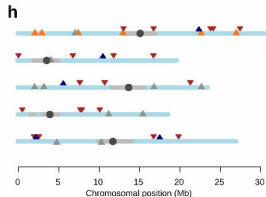

▲ Transgene insertion ▲ *KEEs* ● Centromere ■ Heterochromatin ▲ DE genes ▼ DE sRNA down ▲ DE sRNA up

**Fig. 4**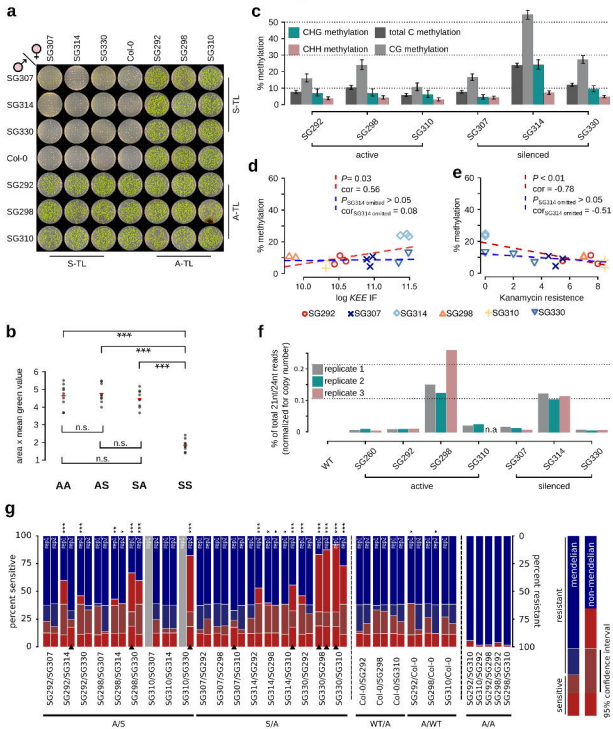

Source: https://www.biorxiv.org/content/10.1101/500496v1.full.pdf
