# Supplementary material for: Invasive DNA elements modify nuclear architecture by KNOT-Linked Silencing in plants
Source: bioRxiv or medRxiv preprint supplement (doi:10.1101/500496), 2018-12-19
Supplement: Supplementary file [file media-1.pdf]

1 **Supplemental Materials and Methods**

2  
3 **Invasive DNA elements modify nuclear architecture by *KNOT*-Linked Silencing in**  
4 **plants**

5  
6 **Stefan Grob<sup>a,1</sup> and Ueli Grossniklaus<sup>a,1</sup>**

7 <sup>a</sup>Department of Plant and Microbial Biology & Zurich-Basel Plant Science Center, University  
8 of Zurich, Zollikerstrasse 107, 8008 Zurich, Switzerland  
9

10 **Supplementary Tables**

11

12 **Table S1.** Transgene copy number analyzed by droplet digital PCR (ddPCR). The transgene  
 13 copy number was assessed using the *NPTII* (*KAN*) gene relative to two endogenous single  
 14 copy loci (*FIE* (AT3G20740) and *LYS* (AT5G62150)). The final copy number was determined  
 15 by the mean of *KAN/FIE* and *KAN/LYS* ratios.

16

| Parental | F1     | <i>KAN</i> rep1<br>(copies/ $\mu$ l) | <i>KAN</i> rep2<br>(copies/ $\mu$ l) | <i>FIE</i> rep1<br>(copies/ $\mu$ l) | <i>FIE</i> rep2<br>(copies/ $\mu$ l) | <i>LYS</i> rep1<br>(copies/ $\mu$ l) | <i>LYS</i> rep2<br>(copies/ $\mu$ l) | <i>KAN/FIE</i> | <i>KAN/LYS</i> | Copy number |
|----------|--------|--------------------------------------|--------------------------------------|--------------------------------------|--------------------------------------|--------------------------------------|--------------------------------------|----------------|----------------|-------------|
| SG261    | SG261  | 55.9                                 | 62.9                                 | 59.1                                 | 53.8                                 | 61.1                                 | 54.3                                 | 1.1            | 1              | 1           |
| SG261    | SG368  | 36.2                                 | 35.1                                 | 38                                   | 39.3                                 | 39.8                                 | 36.4                                 | 0.9            | 0.9            | 1           |
| SG261    | SG371  | 87                                   | 82.8                                 | 96.6                                 | 107.7                                | 91.8                                 | 108.7                                | 0.8            | 0.8            | 1           |
| SG292    | SG335  | 52.3                                 | 49.5                                 | 50.5                                 | 50.3                                 | 54                                   | 49.1                                 | 1              | 1              | 1           |
| SG292    | SG337  | 132                                  | 144.7                                | 145                                  | 148                                  | 145.6                                | 159                                  | 0.9            | 0.9            | 1           |
| SG292    | SG369  | 170                                  | 146                                  | 169                                  | 168                                  | 177                                  | 182                                  | 0.9            | 0.9            | 1           |
| SG298    | SG350  | 298                                  | 302                                  | 324                                  | 319                                  | 337                                  | 309                                  | 0.9            | 0.9            | 1           |
| SG298    | SG361  | 168                                  | 161                                  | 160                                  | 171                                  | 184                                  | 175                                  | 1              | 0.9            | 1           |
| SG298    | SG362  | 61.9                                 | 61.7                                 | 51.1                                 | 42.8                                 | 43.7                                 | 47.6                                 | 1.3            | 1.4            | 1           |
| SG307    | SG342  | 304                                  | 284                                  | 90.1                                 | 84                                   | 82.9                                 | 78.9                                 | 3.4            | 3.6            | 4           |
| SG307    | SG355  | 346                                  | 370                                  | 139                                  | 119                                  | 85.6                                 | 128                                  | 2.8            | 3.4            | 3           |
| SG307    | SG356  | 408                                  | 494                                  | 144.7                                | 176                                  | 159                                  | 206                                  | 2.8            | 2.5            | 3           |
| SG310    | SG340  | 127.7                                | 115                                  | 134                                  | 133                                  | 135                                  | 126                                  | 0.9            | 0.9            | 1           |
| SG310    | SG358  | 37.9                                 | 40.7                                 | 38.7                                 | 41.3                                 | 40.4                                 | 42.5                                 | 1              | 0.9            | 1           |
| SG314    | SG346  | 628                                  | 576                                  | 215                                  | 215                                  | 217                                  | 258                                  | 2.8            | 2.5            | 3           |
| SG314    | SG354  | 562                                  | 499                                  | 166                                  | 187                                  | 183                                  | 196                                  | 3              | 2.8            | 3           |
| SG314    | SG357  | 355                                  | 361                                  | 116.9                                | 125.8                                | 133.3                                | 129.3                                | 3              | 2.7            | 3           |
| SG330    | SG352  | 472                                  | 484                                  | 94                                   | 103.2                                | 107.8                                | 103.4                                | 4.8            | 4.5            | 5           |
| SG330    | SG353  | 926                                  | 843                                  | 134.8                                | 139                                  | 139                                  | 153                                  | 6.5            | 6.1            | 6           |
| SG330    | SG359  | 1334                                 | 1390                                 | 275                                  | 246                                  | 273                                  | 281                                  | 5.2            | 4.9            | 5           |
| SG333    | SG366  | 70.8                                 | 60.9                                 | 61.9                                 | 69.5                                 | 76.8                                 | 76.2                                 | 1              | 0.9            | 1           |
| SG333    | SG367  | 50.2                                 | 51.6                                 | 55.2                                 | 53.4                                 | 63.8                                 | 63.5                                 | 0.9            | 0.8            | 1           |
| SG333    | SG373  | 35.4                                 | 36.7                                 | 43.8                                 | 41                                   | 42.8                                 | 44                                   | 0.9            | 0.8            | 1           |
| SG339    | SG339B | 0.2                                  | 0.07                                 | 164                                  | 168                                  | 171                                  | 60.2                                 | 0              | 0              | 0           |
| SG339    | SG339C | 0.07                                 | 0.15                                 | 105.9                                | 105                                  | 112                                  | 111.8                                | 0              | 0              | 0           |

17

18 **Table S2.** Kanamycin resistance score. Viability phenotype (scale 0 (dead) to 10 (no effect of  
 19 Kanamycin)) was scored double blindly based on images acquired from 14-day-old seedlings  
 20 grown on kanamycin containing medium.

| Parental | F1     | score 1 | score 2 | mean score |
|----------|--------|---------|---------|------------|
| SG261    | SG261  | 7       | 7       | 7          |
| SG261    | SG368  | 7       | 7       | 7          |
| SG261    | SG371  | 7       | 7       | 7          |
| SG292    | SG335  | 5       | 6       | 5.5        |
| SG292    | SG337  | 8       | 8       | 8          |
| SG292    | SG369  | 7       | 8       | 7.5        |
| SG298    | SG350  | 7       | 7       | 7          |
| SG298    | SG361  | 8       | 7       | 7.5        |
| SG298    | SG362  | 7       | 7       | 7          |
| SG307    | SG342  | 5       | 6       | 5.5        |
| SG307    | SG355  | 5       | 5       | 5          |
| SG307    | SG356  | 4       | 5       | 4.5        |
| SG310    | SG340  | 9       | 8       | 8.5        |
| SG310    | SG358  | 9       | 8       | 8.5        |
| SG314    | SG346  | 0       | 0       | 0          |
| SG314    | SG354  | 0       | 0       | 0          |
| SG314    | SG357  | 0       | 0       | 0          |
| SG330    | SG352  | 3       | 3       | 3          |
| SG330    | SG353  | 3       | 4       | 3.5        |
| SG330    | SG359  | 0       | 0       | 0          |
| SG333    | SG366  | 8       | 8       | 8          |
| SG333    | SG367  | 8       | 8       | 8          |
| SG333    | SG373  | 9       | 7       | 8          |
| SG339    | SG339A | 0       | 0       | 0          |
| SG339    | SG339B | 0       | 0       | 0          |
| SG339    | SG339C | 0       | 0       | 0          |

21

22 **Table S3.** Methylation analysis by Sanger sequencing after bisulfite treatment. Target:  
 23 Chloroplast DNA. Chloroplast DNA is not methylated and serves to assess bisulfite  
 24 conversion efficiency. Hence, the column “Unmethylated (percent)” indicates bisulfite  
 25 conversion efficiency.

26  
 27

| Parental | F1    | Context | Methylated (percent) | Unmethylated (percent) | Number of mC | Number of C | Total Cytosines | Clones analyzed |
|----------|-------|---------|----------------------|------------------------|--------------|-------------|-----------------|-----------------|
| SG292    | SG335 | All     | 1.7%                 | 98.3%                  | 13           | 732         | 745             | 25              |
| SG292    | SG335 | CG      | 1.4%                 | 98.6%                  | 1            | 72          | 73              | 25              |
| SG292    | SG335 | CHG     | 1.3%                 | 98.7%                  | 2            | 147         | 149             | 25              |
| SG292    | SG335 | CHH     | 1.9%                 | 98.1%                  | 10           | 513         | 523             | 25              |
| SG292    | SG369 | All     | 6.2%                 | 93.8%                  | 11           | 166         | 177             | 6               |
| SG292    | SG369 | CG      | 6.3%                 | 93.8%                  | 1            | 15          | 16              | 6               |
| SG292    | SG369 | CHG     | 5.6%                 | 94.4%                  | 2            | 34          | 36              | 6               |
| SG292    | SG369 | CHH     | 6.4%                 | 93.6%                  | 8            | 117         | 125             | 6               |
| SG298    | SG350 | All     | 2.6%                 | 97.5%                  | 13           | 497         | 510             | 17              |
| SG298    | SG350 | CG      | 0.0%                 | 100.0%                 | 0            | 51          | 51              | 17              |
| SG298    | SG350 | CHG     | 4.9%                 | 95.1%                  | 5            | 97          | 102             | 17              |
| SG298    | SG350 | CHH     | 2.2%                 | 97.8%                  | 8            | 349         | 357             | 17              |
| SG298    | SG362 | All     | 4.7%                 | 95.3%                  | 21           | 427         | 448             | 15              |
| SG298    | SG362 | CG      | 2.3%                 | 97.7%                  | 1            | 43          | 44              | 15              |
| SG298    | SG362 | CHG     | 4.5%                 | 95.5%                  | 4            | 85          | 89              | 15              |
| SG298    | SG362 | CHH     | 5.1%                 | 94.9%                  | 16           | 299         | 315             | 15              |
| SG307    | SG355 | All     | 0.7%                 | 99.3%                  | 3            | 417         | 420             | 14              |
| SG307    | SG355 | CG      | 0.0%                 | 100.0%                 | 0            | 42          | 42              | 14              |
| SG307    | SG355 | CHG     | 0.0%                 | 100.0%                 | 0            | 84          | 84              | 14              |
| SG307    | SG355 | CHH     | 1.0%                 | 99.0%                  | 3            | 291         | 294             | 14              |
| SG307    | SG356 | All     | 2.8%                 | 97.2%                  | 11           | 378         | 389             | 13              |
| SG307    | SG356 | CG      | 2.6%                 | 97.4%                  | 1            | 38          | 39              | 13              |
| SG307    | SG356 | CHG     | 2.6%                 | 97.4%                  | 2            | 76          | 78              | 13              |
| SG307    | SG356 | CHH     | 2.9%                 | 97.1%                  | 8            | 264         | 272             | 13              |
| SG310    | SG358 | All     | 1.1%                 | 98.9%                  | 3            | 267         | 270             | 9               |
| SG310    | SG358 | CG      | 0.0%                 | 100.0%                 | 0            | 27          | 27              | 9               |
| SG310    | SG358 | CHG     | 0.0%                 | 100.0%                 | 0            | 54          | 54              | 9               |
| SG310    | SG358 | CHH     | 1.6%                 | 98.4%                  | 3            | 186         | 189             | 9               |
| SG314    | SG346 | All     | 1.2%                 | 98.8%                  | 4            | 326         | 330             | 11              |
| SG314    | SG346 | CG      | 0.0%                 | 100.0%                 | 0            | 33          | 33              | 11              |
| SG314    | SG346 | CHG     | 1.5%                 | 98.5%                  | 1            | 65          | 66              | 11              |
| SG314    | SG346 | CHH     | 1.3%                 | 98.7%                  | 3            | 228         | 231             | 11              |
| SG314    | SG357 | All     | 4.5%                 | 95.5%                  | 20           | 427         | 447             | 15              |
| SG314    | SG357 | CG      | 4.7%                 | 95.3%                  | 2            | 41          | 43              | 15              |
| SG314    | SG357 | CHG     | 4.4%                 | 95.6%                  | 4            | 86          | 90              | 15              |
| SG314    | SG357 | CHH     | 4.5%                 | 95.5%                  | 14           | 300         | 314             | 15              |
| SG330    | SG349 | All     | 3.4%                 | 96.7%                  | 14           | 404         | 418             | 14              |
| SG330    | SG349 | CG      | 4.9%                 | 95.1%                  | 2            | 39          | 41              | 14              |
| SG330    | SG349 | CHG     | 1.2%                 | 98.8%                  | 1            | 82          | 83              | 14              |
| SG330    | SG349 | CHH     | 3.7%                 | 96.3%                  | 11           | 283         | 294             | 14              |
| SG330    | SG353 | All     | 2.1%                 | 97.9%                  | 5            | 235         | 240             | 8               |
| SG330    | SG353 | CG      | 4.2%                 | 95.8%                  | 1            | 23          | 24              | 8               |
| SG330    | SG353 | CHG     | 4.2%                 | 95.8%                  | 2            | 46          | 48              | 8               |
| SG330    | SG353 | CHH     | 1.2%                 | 98.8%                  | 2            | 166         | 168             | 8               |
| SG330    | SG359 | All     | 2.4%                 | 97.6%                  | 13           | 520         | 533             | 18              |
| SG330    | SG359 | CG      | 1.9%                 | 98.1%                  | 1            | 51          | 52              | 18              |
| SG330    | SG359 | CHG     | 0.0%                 | 100.0%                 | 0            | 107         | 107             | 18              |
| SG330    | SG359 | CHH     | 3.2%                 | 96.8%                  | 12           | 362         | 374             | 18              |

28  
 29

30 **Table S4.** Methylation analysis by Sanger sequencing after bisulfite sequencing. Target:  
 31 nopaline synthase promoter (*nosP*).  
 32

| Parental | F1    | Context | Methylated (percent) | Unmethylated (percent) | Number of mC | Number of C | Total Cytosines | Clones analyzed |
|----------|-------|---------|----------------------|------------------------|--------------|-------------|-----------------|-----------------|
| SG292    | SG335 | All     | 7.7%                 | 92.3%                  | 93           | 1111        | 1204            | 17              |
| SG292    | SG335 | CG      | 14.7%                | 85.3%                  | 50           | 289         | 339             | 17              |
| SG292    | SG335 | CHG     | 8.4%                 | 91.6%                  | 20           | 218         | 238             | 17              |
| SG292    | SG335 | CHH     | 3.7%                 | 96.3%                  | 23           | 604         | 627             | 17              |
| SG292    | SG337 | All     | 5.9%                 | 94.1%                  | 67           | 1064        | 1131            | 16              |
| SG292    | SG337 | CG      | 14.4%                | 85.6%                  | 46           | 274         | 320             | 16              |
| SG292    | SG337 | CHG     | 4.0%                 | 96.0%                  | 9            | 214         | 223             | 16              |
| SG292    | SG337 | CHH     | 2.0%                 | 98.0%                  | 12           | 576         | 588             | 16              |
| SG292    | SG369 | All     | 11.2%                | 88.8%                  | 71           | 562         | 633             | 9               |
| SG292    | SG369 | CG      | 21.1%                | 78.9%                  | 38           | 142         | 180             | 9               |
| SG292    | SG369 | CHG     | 9.6%                 | 90.4%                  | 12           | 113         | 125             | 9               |
| SG292    | SG369 | CHH     | 6.4%                 | 93.6%                  | 21           | 307         | 328             | 9               |
| SG298    | SG350 | All     | 10.2%                | 89.9%                  | 172          | 1522        | 1694            | 24              |
| SG298    | SG350 | CG      | 23.9%                | 76.1%                  | 114          | 363         | 477             | 24              |
| SG298    | SG350 | CHG     | 7.8%                 | 92.2%                  | 26           | 307         | 333             | 24              |
| SG298    | SG350 | CHH     | 3.6%                 | 96.4%                  | 32           | 852         | 884             | 24              |
| SG298    | SG362 | All     | 10.8%                | 89.2%                  | 107          | 884         | 991             | 15              |
| SG298    | SG362 | CG      | 24.2%                | 75.8%                  | 69           | 216         | 285             | 15              |
| SG298    | SG362 | CHG     | 5.6%                 | 94.4%                  | 11           | 184         | 195             | 15              |
| SG298    | SG362 | CHH     | 5.3%                 | 94.7%                  | 27           | 484         | 511             | 15              |
| SG307    | SG342 | All     | 8.9%                 | 91.1%                  | 77           | 785         | 862             | 13              |
| SG307    | SG342 | CG      | 18.6%                | 81.4%                  | 46           | 201         | 247             | 13              |
| SG307    | SG342 | CHG     | 2.4%                 | 97.6%                  | 4            | 164         | 168             | 13              |
| SG307    | SG342 | CHH     | 6.0%                 | 94.0%                  | 27           | 420         | 447             | 13              |
| SG307    | SG355 | All     | 4.4%                 | 95.6%                  | 84           | 1811        | 1895            | 27              |
| SG307    | SG355 | CG      | 8.6%                 | 91.4%                  | 46           | 491         | 537             | 27              |
| SG307    | SG355 | CHG     | 3.2%                 | 96.8%                  | 12           | 361         | 373             | 27              |
| SG307    | SG355 | CHH     | 2.6%                 | 97.4%                  | 26           | 959         | 985             | 27              |
| SG307    | SG356 | All     | 10.7%                | 89.3%                  | 187          | 1556        | 1743            | 28              |
| SG307    | SG356 | CG      | 23.9%                | 76.1%                  | 119          | 378         | 497             | 28              |
| SG307    | SG356 | CHG     | 7.0%                 | 93.0%                  | 24           | 317         | 341             | 28              |
| SG307    | SG356 | CHH     | 4.9%                 | 95.1%                  | 44           | 861         | 905             | 28              |
| SG310    | SG340 | All     | 8.2%                 | 91.8%                  | 97           | 1082        | 1179            | 17              |
| SG310    | SG340 | CG      | 14.5%                | 85.5%                  | 48           | 284         | 332             | 17              |
| SG310    | SG340 | CHG     | 9.9%                 | 90.1%                  | 23           | 210         | 233             | 17              |
| SG310    | SG340 | CHH     | 4.2%                 | 95.8%                  | 26           | 588         | 614             | 17              |
| SG310    | SG358 | All     | 3.4%                 | 96.6%                  | 41           | 1163        | 1204            | 17              |
| SG310    | SG358 | CG      | 6.8%                 | 93.2%                  | 23           | 315         | 338             | 17              |
| SG310    | SG358 | CHG     | 2.5%                 | 97.5%                  | 6            | 232         | 238             | 17              |
| SG310    | SG358 | CHH     | 1.9%                 | 98.1%                  | 12           | 616         | 628             | 17              |
| SG314    | SG346 | All     | 23.4%                | 76.6%                  | 432          | 1414        | 1846            | 26              |
| SG314    | SG346 | CG      | 52.3%                | 47.7%                  | 272          | 248         | 520             | 26              |
| SG314    | SG346 | CHG     | 24.7%                | 75.3%                  | 90           | 274         | 364             | 26              |
| SG314    | SG346 | CHH     | 7.3%                 | 92.7%                  | 70           | 892         | 962             | 26              |
| SG314    | SG354 | All     | 24.8%                | 75.2%                  | 176          | 534         | 710             | 10              |
| SG314    | SG354 | CG      | 55.0%                | 45.0%                  | 110          | 90          | 200             | 10              |
| SG314    | SG354 | CHG     | 27.1%                | 72.9%                  | 38           | 102         | 140             | 10              |
| SG314    | SG354 | CHH     | 7.6%                 | 92.4%                  | 28           | 342         | 370             | 10              |
| SG314    | SG357 | All     | 24.0%                | 76.0%                  | 419          | 1329        | 1748            | 25              |
| SG314    | SG357 | CG      | 56.7%                | 43.3%                  | 281          | 215         | 496             | 25              |
| SG314    | SG357 | CHG     | 22.4%                | 77.6%                  | 77           | 267         | 344             | 25              |
| SG314    | SG357 | CHH     | 6.7%                 | 93.3%                  | 61           | 847         | 908             | 25              |
| SG330    | SG349 | All     | 12.2%                | 87.8%                  | 285          | 2048        | 2333            | 36              |
| SG330    | SG349 | CG      | 26.9%                | 73.1%                  | 177          | 480         | 657             | 36              |
| SG330    | SG349 | CHG     | 9.9%                 | 90.1%                  | 46           | 418         | 464             | 36              |
| SG330    | SG349 | CHH     | 5.1%                 | 94.9%                  | 62           | 1150        | 1212            | 36              |
| SG330    | SG353 | All     | 7.0%                 | 93.1%                  | 38           | 509         | 547             | 8               |
| SG330    | SG353 | CG      | 16.6%                | 83.4%                  | 26           | 131         | 157             | 8               |
| SG330    | SG353 | CHG     | 4.6%                 | 95.4%                  | 5            | 103         | 108             | 8               |
| SG330    | SG353 | CHH     | 2.5%                 | 97.5%                  | 7            | 275         | 282             | 8               |
| SG330    | SG359 | All     | 13.2%                | 86.8%                  | 280          | 1840        | 2120            | 32              |
| SG330    | SG359 | CG      | 30.5%                | 69.5%                  | 183          | 417         | 600             | 32              |
| SG330    | SG359 | CHG     | 10.2%                | 89.8%                  | 43           | 377         | 420             | 32              |
| SG330    | SG359 | CHH     | 4.9%                 | 95.1%                  | 54           | 1046        | 1100            | 32              |

33  
34

| Line  | Transgene insertion site (Chr1) | Genomic bin (300kb) | Viability score |
|-------|---------------------------------|---------------------|-----------------|
| SG535 | 163419                          | 1                   | 1               |
| SG530 | 389812                          | 300001              | 1.5             |
| SG521 | 880496                          | 600001              | 1               |
| SG564 | 982506                          | 900001              | 1               |
| SG519 | 1431190                         | 1200001             | 2               |
| SG524 | 1569192                         | 1500001             | 4               |
| SG346 | 2085299                         | 1800001             | 1               |
| SG539 | 2249133                         | 2100001             | 4.5             |
| SG489 | 2498836                         | 2400001             | 10              |
| SG341 | 2952334                         | 2700001             | 6               |
| SG555 | 3064124                         | 3000001             | 1.5             |
| SG511 | 3442327                         | 3300001             | 2               |
| SG561 | 4084162                         | 3900001             | 3               |
| SG554 | 4286204                         | 4200001             | 4               |
| SG505 | 4694372                         | 4500001             | 1.5             |
| SG568 | 4927011                         | 4800001             | 1.5             |
| SG547 | 5138334                         | 5100001             | 7               |
| SG498 | 5578431                         | 5400001             | 6               |
| SG315 | 6009988                         | 6000001             | 1.5             |
| SG546 | 6528984                         | 6300001             | 1               |
| SG531 | 6765667                         | 6600001             | 3.5             |
| SG309 | 7042672                         | 6900001             | 3               |
| SG335 | 7458618                         | 7200001             | 8               |
| SG556 | 7232006                         | 7200001             | 1               |
| SG548 | 7527079                         | 7500001             | 2               |
| SG313 | 8002649                         | 7800001             | 3               |
| SG518 | 8317396                         | 8100001             | 2.5             |
| SG549 | 8584039                         | 8400001             | 7               |
| SG516 | 8951202                         | 8700001             | 6               |
| SG558 | 9076048                         | 9000001             | 3               |
| SG553 | 9481532                         | 9300001             | 2               |
| SG520 | 9611103                         | 9600001             | 2               |
| SG565 | 9907202                         | 9900001             | 4.5             |
| SG502 | 10407379                        | 10200001            | 2.5             |
| SG522 | 10790022                        | 10500001            | 2               |
| SG311 | 11012274                        | 10800001            | 2               |
| SG506 | 11374893                        | 11100001            | 2               |
| SG513 | 11575320                        | 11400001            | 2               |
| SG570 | 11993298                        | 11700001            | 2               |
| SG503 | 12087580                        | 12000001            | 1               |
| SG544 | 12398435                        | 12300001            | 1               |
| SG494 | 12842158                        | 12600001            | 1               |
| SG340 | 12964622                        | 12900001            | 8               |
| SG532 | 13277274                        | 13200001            | 2               |
| SG534 | 13669441                        | 13500001            | 7               |
| SG304 | 14056029                        | 13800001            | 1               |
| SG537 | 14313049                        | 14100001            | 1               |
| SG508 | 14543277                        | 14400001            | 1.5             |
| SG571 | 15179141                        | 15000001            | 8               |
| SG499 | 15485350                        | 15300001            | 8.5             |
| SG491 | 15849233                        | 15600001            | 2               |
| SG316 | 15951543                        | 15900001            | 2               |
| SG496 | 16266641                        | 16200001            | 1               |
| SG509 | 16646732                        | 16500001            | 1               |
| SG373 | 17053813                        | 16800001            | 9               |
| SG487 | 17165127                        | 17100001            | 5               |
| SG512 | 17603504                        | 17400001            | 7.5             |
| SG351 | 17995869                        | 17700001            | 8               |
| SG541 | 18284335                        | 18000001            | 1               |
| SG540 | 18473908                        | 18300001            | 1               |
| SG517 | 18876837                        | 18600001            | 1               |
| SG567 | 19136251                        | 18900001            | 2               |
| SG507 | 19201789                        | 19200001            | 2               |
| SG306 | 20068163                        | 19800001            | 1               |
| SG488 | 20286882                        | 20100001            | 2               |
| SG528 | 20433912                        | 20400001            | 8               |
| SG526 | 20715563                        | 20700001            | 1               |
| SG308 | 21043366                        | 21000001            | 6.5             |
| SG504 | 21408623                        | 21300001            | 1               |
| SG533 | 21839858                        | 21600001            | 6               |
| SG305 | 22043881                        | 21900001            | 7               |
| SG563 | 22043829                        | 21900001            | 1.5             |
| SG543 | 22271226                        | 22200001            | 1               |
| SG350 | 22625361                        | 22500001            | 9.5             |
| SG368 | 22642823                        | 22500001            | 8               |
| SG566 | 22911205                        | 22800001            | 1               |
| SG486 | 23230956                        | 23100001            | 1.5             |
| SG523 | 23577333                        | 23400001            | 2               |
| SG569 | 23795050                        | 23700001            | 1.5             |
| SG500 | 24054143                        | 24000001            | 2               |
| SG545 | 24489780                        | 24300001            | 3               |
| SG527 | 24861876                        | 24600001            | 5.5             |
| SG536 | 25198182                        | 24900001            | 2               |
| SG515 | 25474140                        | 25200001            | 1               |
| SG551 | 25746736                        | 25500001            | 7               |
| SG550 | 26378794                        | 26100001            | 5.5             |
| SG352 | 26951796                        | 26700001            | 3.5             |
| SG497 | 27437928                        | 27300001            | 8               |
| SG538 | 27752400                        | 27600001            | 6.5             |
| SG495 | 28151924                        | 27900001            | 1               |
| SG525 | 28327886                        | 28200001            | 3               |
| SG559 | 28705527                        | 28500001            | 2               |
| SG303 | 29044174                        | 28800001            | 7               |
| SG560 | 28960387                        | 28800001            | 1               |
| SG510 | 29148256                        | 29100001            | 1.5             |
| SG514 | 29610494                        | 29400001            | 3.5             |
| SG529 | 29976725                        | 29700001            | 3               |
| SG318 | 30038603                        | 30000001            | 1.5             |
| SG493 | 30405432                        | 30300001            | 5               |

38 **Table S6.** Viability analysis by digital image analysis. Images acquired from 14-day-old  
 39 seedlings were used to determine total area covered by seedling tissue and mean grey value  
 40 of the green channel using the ImageJ image analysis software.

41  
 42

| F1    | Area    | Mean value<br>green channel | Area x Mean | Max | Maternal<br>line | Paternal<br>line | Maternal<br>phenotype | Paternal<br>phenotype | Progeny<br>class |
|-------|---------|-----------------------------|-------------|-----|------------------|------------------|-----------------------|-----------------------|------------------|
| SG381 | 2715218 | 203.0                       | 551267995.3 | 255 | SG350            | SG369            | active                | active                | aa               |
| SG383 | 2317627 | 194.7                       | 451177083.3 | 253 | SG358            | SG369            | active                | active                | aa               |
| SG387 | 2516087 | 197.9                       | 497888327.7 | 255 | SG369            | SG350            | active                | active                | aa               |
| SG389 | 1875489 | 195.7                       | 366971306.2 | 255 | SG358            | SG350            | active                | active                | aa               |
| SG399 | 1876518 | 196.6                       | 368902797.1 | 252 | SG369            | SG358            | active                | active                | aa               |
| SG400 | 2147235 | 200.0                       | 429358963.4 | 251 | SG350            | SG358            | active                | active                | aa               |
| SG417 | 2443513 | 195.4                       | 477430674.5 | 255 | SG369            | SG369            | active                | active                | aa               |
| SG418 | 2652069 | 199.8                       | 530000077.2 | 251 | SG350            | SG350            | active                | active                | aa               |
| SG420 | 2590169 | 195.7                       | 506831319.1 | 248 | SG358            | SG358            | active                | active                | aa               |
| SG393 | 2452259 | 191.8                       | 470409487.2 | 253 | SG369            | SG356            | active                | silenced              | as               |
| SG394 | 2090897 | 190.9                       | 399194055.2 | 251 | SG350            | SG356            | active                | silenced              | as               |
| SG395 | 2728205 | 200.3                       | 546530394.8 | 255 | SG358            | SG356            | active                | silenced              | as               |
| SG405 | 2817386 | 194.5                       | 548052011.7 | 246 | SG369            | SG346            | active                | silenced              | as               |
| SG406 | 2247877 | 200.1                       | 449692289.6 | 255 | SG350            | SG346            | active                | silenced              | as               |
| SG408 | 2183235 | 196.9                       | 429876788.3 | 241 | SG358            | SG346            | active                | silenced              | as               |
| SG411 | 2356989 | 197.6                       | 465854161.9 | 255 | SG369            | SG359            | active                | silenced              | as               |
| SG412 | 2291818 | 197.5                       | 452654681.4 | 255 | SG350            | SG359            | active                | silenced              | as               |
| SG414 | 2719761 | 196.0                       | 532997002.7 | 253 | SG358            | SG359            | active                | silenced              | as               |
| SG374 | 2724989 | 197.9                       | 539144523.6 | 255 | SG369            | SG339            | active                | WT                    | aw               |
| SG375 | 2441905 | 194.9                       | 475829608.3 | 255 | SG350            | SG339            | active                | WT                    | aw               |
| SG377 | 2472109 | 197.2                       | 487517199.6 | 253 | SG358            | SG339            | active                | WT                    | aw               |
| SG382 | 2066800 | 197.3                       | 407856111.6 | 247 | SG356            | SG369            | silenced              | active                | sa               |
| SG384 | 2208681 | 200.9                       | 443715178.2 | 255 | SG346            | SG369            | silenced              | active                | sa               |
| SG385 | 2539552 | 193.9                       | 492436909.7 | 250 | SG359            | SG369            | silenced              | active                | sa               |
| SG388 | 2637839 | 196.5                       | 518235125.6 | 254 | SG356            | SG350            | silenced              | active                | sa               |
| SG390 | 1873755 | 195.7                       | 366647009.6 | 255 | SG346            | SG350            | silenced              | active                | sa               |
| SG391 | 2262987 | 194.8                       | 440857023.4 | 255 | SG359            | SG350            | silenced              | active                | sa               |
| SG401 | 2030258 | 196.6                       | 399171055.6 | 247 | SG356            | SG358            | silenced              | active                | sa               |
| SG402 | 2415199 | 201.7                       | 487155299.1 | 255 | SG346            | SG358            | silenced              | active                | sa               |
| SG403 | 2382035 | 197.1                       | 469396671   | 253 | SG359            | SG358            | silenced              | active                | sa               |
| SG396 | 949500  | 189.7                       | 180085018.5 | 255 | SG346            | SG356            | silenced              | silenced              | ss               |
| SG397 | 1183023 | 187.7                       | 222025024.5 | 255 | SG359            | SG356            | silenced              | silenced              | ss               |
| SG407 | 929527  | 189.3                       | 175945518.2 | 255 | SG356            | SG346            | silenced              | silenced              | ss               |
| SG409 | 876358  | 189.5                       | 166028652.2 | 255 | SG359            | SG346            | silenced              | silenced              | ss               |
| SG413 | 1315324 | 182.7                       | 240316271.4 | 255 | SG356            | SG359            | silenced              | silenced              | ss               |
| SG415 | 1037578 | 184.2                       | 191099040.9 | 255 | SG346            | SG359            | silenced              | silenced              | ss               |
| SG419 | 1033947 | 188.8                       | 195174039.4 | 254 | SG356            | SG356            | silenced              | silenced              | ss               |
| SG421 | 739776  | 187.9                       | 139011308.2 | 255 | SG346            | SG346            | silenced              | silenced              | ss               |
| SG422 | 764893  | 188.2                       | 143949038.1 | 255 | SG359            | SG359            | silenced              | silenced              | ss               |
| SG376 | 1052762 | 186.6                       | 196416964.6 | 255 | SG356            | SG339            | silenced              | WT                    | sw               |
| SG378 | 1313899 | 184.4                       | 242326334.3 | 255 | SG346            | SG339            | silenced              | WT                    | sw               |
| SG379 | 899555  | 186.2                       | 167477350.8 | 254 | SG359            | SG339            | silenced              | WT                    | sw               |
| SG380 | 2699148 | 196.9                       | 531373169.3 | 247 | SG339            | SG369            | WT                    | active                | wa               |
| SG386 | 2469660 | 195.1                       | 481914634.4 | 255 | SG339            | SG350            | WT                    | active                | wa               |
| SG398 | 2588310 | 198.8                       | 514649207.2 | 255 | SG339            | SG358            | WT                    | active                | wa               |
| SG392 | 1286285 | 187.4                       | 241069103.3 | 255 | SG339            | SG356            | WT                    | silenced              | ws               |
| SG404 | 656335  | 185.6                       | 121838747.7 | 255 | SG339            | SG346            | WT                    | silenced              | ws               |
| SG410 | 950428  | 189.2                       | 179803869.9 | 255 | SG339            | SG359            | WT                    | silenced              | ws               |
| SG416 | 1240365 | 184.7                       | 229076810   | 255 | SG339            | SG339            | WT                    | WT                    | ww               |

43  
 44

45 **Table S7.** Phenotypic segregation analysis of F2 seedling populations. Seeds from four F1  
 46 self-crossed siblings were pooled and plated on media containing kanamycin. Kanamycin  
 47 sensitivity was assessed in 14-day-old seedlings. \*: scores were taken over from pooled data  
 48 of **Table S8.** r: resistant, s: sensitive, WT: wild-type

| Selfed F1 | Sensitive offspring | Resistant offspring | Total analyzed | Not germinated | Mother | Father | Ancestral maternal genotype | Ancestral paternal genotype | Ancestral phenotype (m/p) | Replicate |
|-----------|---------------------|---------------------|----------------|----------------|--------|--------|-----------------------------|-----------------------------|---------------------------|-----------|
| SG399     | 3                   | 49                  | 52             | 0              | SG369  | SG358  | SG292                       | SG310                       | r/r                       | Rep1      |
| SG417     | 0                   | 52                  | 52             | 0              | SG369  | SG369  | SG292                       | SG292                       | r/r                       | Rep1      |
| SG400     | 1                   | 49                  | 50             | 2              | SG350  | SG358  | SG298                       | SG310                       | r/r                       | Rep1      |
| SG381     | 2                   | 49                  | 51             | 1              | SG350  | SG369  | SG298                       | SG292                       | r/r                       | Rep1      |
| SG418     | 1                   | 47                  | 48             | 4              | SG350  | SG350  | SG298                       | SG298                       | r/r                       | Rep1      |
| SG383     | 1                   | 49                  | 50             | 2              | SG358  | SG369  | SG310                       | SG292                       | r/r                       | Rep1      |
| SG420     | 1                   | 51                  | 52             | 0              | SG358  | SG358  | SG310                       | SG310                       | r/r                       | Rep1      |
| SG405     | 28                  | 19                  | 47             | 5              | SG369  | SG346  | SG292                       | SG314                       | r/s                       | Rep1      |
| SG393     | 11                  | 37                  | 48             | 4              | SG369  | SG356  | SG292                       | SG307                       | r/s                       | Rep1      |
| SG411     | 24                  | 28                  | 52             | 0              | SG369  | SG359  | SG292                       | SG330                       | r/s                       | Rep1      |
| SG406     | 22                  | 29                  | 51             | 1              | SG350  | SG346  | SG298                       | SG314                       | r/s                       | Rep1      |
| SG394     | 17                  | 29                  | 46             | 6              | SG350  | SG356  | SG298                       | SG307                       | r/s                       | Rep1      |
| SG412*    | 129                 | 65                  | 194            | 14             | SG350  | SG359  | SG298                       | SG330                       | r/s                       | Rep1      |
| SG408     | 8                   | 40                  | 48             | 4              | SG358  | SG346  | SG310                       | SG314                       | r/s                       | Rep1      |
| SG374     | 18                  | 28                  | 46             | 6              | SG369  | SG339  | SG292                       | SG339                       | r/WT                      | Rep1      |
| SG375     | 13                  | 36                  | 49             | 3              | SG350  | SG339  | SG298                       | SG339                       | r/WT                      | Rep1      |
| SG377     | 14                  | 38                  | 52             | 0              | SG358  | SG339  | SG310                       | SG339                       | r/WT                      | Rep1      |
| SG388     | 9                   | 40                  | 49             | 3              | SG356  | SG350  | SG307                       | SG298                       | s/r                       | Rep1      |
| SG401*    | 35                  | 112                 | 147            | 7              | SG356  | SG358  | SG307                       | SG310                       | s/r                       | Rep1      |
| SG382     | 8                   | 43                  | 51             | 1              | SG356  | SG369  | SG307                       | SG292                       | s/r                       | Rep1      |
| SG390     | 19                  | 29                  | 48             | 4              | SG346  | SG350  | SG314                       | SG298                       | s/r                       | Rep1      |
| SG402     | 20                  | 32                  | 52             | 0              | SG346  | SG358  | SG314                       | SG310                       | s/r                       | Rep1      |
| SG384     | 13                  | 37                  | 50             | 2              | SG346  | SG369  | SG314                       | SG292                       | s/r                       | Rep1      |
| SG391*    | 164                 | 33                  | 197            | 11             | SG359  | SG350  | SG330                       | SG298                       | s/r                       | Rep1      |
| SG403*    | 179                 | 16                  | 195            | 13             | SG359  | SG358  | SG330                       | SG310                       | s/r                       | Rep1      |
| SG385     | 24                  | 28                  | 52             | 0              | SG359  | SG369  | SG330                       | SG292                       | s/r                       | Rep1      |
| SG407     | 36                  | 11                  | 47             | 5              | SG356  | SG346  | SG307                       | SG314                       | s/s                       | Rep1      |
| SG419     | 46                  | 5                   | 51             | 1              | SG356  | SG356  | SG307                       | SG307                       | s/s                       | Rep1      |
| SG396     | 23                  | 24                  | 47             | 5              | SG346  | SG356  | SG314                       | SG307                       | s/s                       | Rep1      |
| SG415     | 50                  | 0                   | 50             | 2              | SG346  | SG359  | SG314                       | SG330                       | s/s                       | Rep1      |
| SG421     | 51                  | 0                   | 51             | 1              | SG346  | SG346  | SG314                       | SG314                       | s/s                       | Rep1      |
| SG409     | 49                  | 0                   | 49             | 3              | SG359  | SG346  | SG330                       | SG314                       | s/s                       | Rep1      |
| SG397     | 50                  | 1                   | 51             | 1              | SG359  | SG356  | SG330                       | SG307                       | s/s                       | Rep1      |
| SG422     | 49                  | 0                   | 49             | 3              | SG359  | SG359  | SG330                       | SG330                       | s/s                       | Rep1      |
| SG416     | 52                  | 0                   | 52             | 0              | SG339  | SG339  | SG339                       | SG339                       | s/s                       | Rep1      |
| SG376     | 48                  | 0                   | 48             | 4              | SG356  | SG339  | SG307                       | SG339                       | s/WT                      | Rep1      |
| SG378     | 52                  | 0                   | 52             | 0              | SG346  | SG339  | SG314                       | SG339                       | s/WT                      | Rep1      |
| SG379     | 49                  | 0                   | 49             | 3              | SG359  | SG339  | SG330                       | SG339                       | s/WT                      | Rep1      |
| SG386     | 17                  | 34                  | 51             | 1              | SG339  | SG350  | SG339                       | SG298                       | WT/r                      | Rep1      |
| SG398     | 14                  | 36                  | 50             | 2              | SG339  | SG358  | SG339                       | SG310                       | WT/r                      | Rep1      |
| SG380     | 7                   | 43                  | 50             | 2              | SG339  | SG369  | SG339                       | SG292                       | WT/r                      | Rep1      |
| SG404     | 52                  | 0                   | 52             | 0              | SG339  | SG346  | SG339                       | SG314                       | WT/s                      | Rep1      |
| SG392     | 47                  | 0                   | 47             | 5              | SG339  | SG356  | SG339                       | SG307                       | WT/s                      | Rep1      |
| SG410     | 52                  | 0                   | 52             | 0              | SG339  | SG359  | SG339                       | SG330                       | WT/s                      | Rep1      |
| SG436     | 1                   | 47                  | 48             | 4              | SG369  | SG350  | SG292                       | SG298                       | r/r                       | Rep2      |
| SG448     | 3                   | 47                  | 50             | 2              | SG369  | SG358  | SG292                       | SG310                       | r/r                       | Rep2      |
| SG466     | 0                   | 49                  | 49             | 3              | SG369  | SG369  | SG292                       | SG292                       | r/r                       | Rep2      |
| SG449     | 1                   | 50                  | 51             | 1              | SG350  | SG358  | SG298                       | SG310                       | r/r                       | Rep2      |
| SG467     | 51                  | 0                   | 51             | 1              | SG350  | SG350  | SG298                       | SG298                       | r/r                       | Rep2      |
| SG469     | 1                   | 47                  | 48             | 4              | SG358  | SG358  | SG310                       | SG310                       | r/r                       | Rep2      |
| SG454*    | 37                  | 114                 | 151            | 5              | SG369  | SG346  | SG292                       | SG314                       | r/s                       | Rep2      |
| SG442     | 9                   | 40                  | 49             | 3              | SG369  | SG356  | SG292                       | SG307                       | r/s                       | Rep2      |
| SG460     | 17                  | 34                  | 51             | 1              | SG369  | SG359  | SG292                       | SG330                       | r/s                       | Rep2      |
| SG455     | 19                  | 30                  | 49             | 3              | SG350  | SG346  | SG298                       | SG314                       | r/s                       | Rep2      |
| SG443     | 7                   | 44                  | 51             | 1              | SG350  | SG356  | SG298                       | SG307                       | r/s                       | Rep2      |
| SG461     | 31                  | 21                  | 52             | 0              | SG350  | SG359  | SG298                       | SG330                       | r/s                       | Rep2      |
| SG457     | 8                   | 40                  | 48             | 4              | SG358  | SG346  | SG310                       | SG314                       | r/s                       | Rep2      |
| SG444     | 12                  | 37                  | 49             | 3              | SG358  | SG356  | SG310                       | SG307                       | r/s                       | Rep2      |
| SG463*    | 153                 | 33                  | 186            | 22             | SG358  | SG359  | SG310                       | SG330                       | r/s                       | Rep2      |
| SG423     | 8                   | 44                  | 52             | 0              | SG369  | SG339  | SG292                       | SG339                       | r/WT                      | Rep2      |
| SG424     | 6                   | 44                  | 50             | 2              | SG350  | SG339  | SG298                       | SG339                       | r/WT                      | Rep2      |
| SG426     | 11                  | 41                  | 52             | 0              | SG358  | SG339  | SG310                       | SG339                       | r/WT                      | Rep2      |
| SG437     | 9                   | 38                  | 47             | 5              | SG356  | SG350  | SG307                       | SG298                       | s/r                       | Rep2      |
| SG450     | 8                   | 43                  | 51             | 1              | SG356  | SG358  | SG307                       | SG310                       | s/r                       | Rep2      |
| SG431     | 13                  | 39                  | 52             | 0              | SG356  | SG369  | SG307                       | SG292                       | s/r                       | Rep2      |
| SG439     | 18                  | 30                  | 48             | 4              | SG346  | SG350  | SG314                       | SG298                       | s/r                       | Rep2      |
| SG451*    | 81                  | 64                  | 145            | 11             | SG346  | SG358  | SG314                       | SG310                       | s/r                       | Rep2      |
| SG433     | 26                  | 23                  | 49             | 3              | SG346  | SG369  | SG314                       | SG292                       | s/r                       | Rep2      |
| SG440*    | 165                 | 24                  | 189            | 19             | SG359  | SG350  | SG330                       | SG298                       | s/r                       | Rep2      |
| SG452     | 38                  | 14                  | 52             | 0              | SG359  | SG358  | SG330                       | SG310                       | s/r                       | Rep2      |
| SG434     | 15                  | 35                  | 50             | 2              | SG359  | SG369  | SG330                       | SG292                       | s/r                       | Rep2      |
| SG456     | 49                  | 0                   | 49             | 3              | SG356  | SG346  | SG307                       | SG314                       | s/s                       | Rep2      |
| SG462     | 51                  | 0                   | 51             | 1              | SG356  | SG359  | SG307                       | SG330                       | s/s                       | Rep2      |
| SG468     | 3                   | 49                  | 52             | 0              | SG356  | SG356  | SG307                       | SG307                       | s/s                       | Rep2      |
| SG445     | 49                  | 0                   | 49             | 3              | SG346  | SG356  | SG314                       | SG307                       | s/s                       | Rep2      |
| SG464     | 47                  | 0                   | 47             | 5              | SG346  | SG359  | SG314                       | SG330                       | s/s                       | Rep2      |
| SG470     | 50                  | 0                   | 50             | 2              | SG346  | SG346  | SG314                       | SG314                       | s/s                       | Rep2      |
| SG458     | 49                  | 2                   | 51             | 1              | SG359  | SG346  | SG330                       | SG314                       | s/s                       | Rep2      |
| SG446     | 52                  | 0                   | 52             | 0              | SG359  | SG356  | SG330                       | SG307                       | s/s                       | Rep2      |
| SG471     | 51                  | 0                   | 51             | 1              | SG359  | SG359  | SG330                       | SG330                       | s/s                       | Rep2      |
| SG465     | 52                  | 0                   | 52             | 0              | SG339  | SG339  | SG339                       | SG339                       | s/s                       | Rep2      |
| SG425     | 48                  | 4                   | 52             | 0              | SG356  | SG339  | SG307                       | SG339                       | s/WT                      | Rep2      |
| SG427     | 48                  | 4                   | 52             | 0              | SG346  | SG339  | SG314                       | SG339                       | s/WT                      | Rep2      |
| SG428     | 52                  | 0                   | 52             | 0              | SG359  | SG339  | SG330                       | SG339                       | s/WT                      | Rep2      |
| SG435     | 16                  | 34                  | 50             | 2              | SG339  | SG350  | SG339                       | SG298                       | WT/r                      | Rep2      |
| SG447     | 12                  | 40                  | 52             | 0              | SG339  | SG358  | SG339                       | SG310                       | WT/r                      | Rep2      |
| SG429     | 11                  | 41                  | 52             | 0              | SG339  | SG369  | SG339                       | SG292                       | WT/r                      | Rep2      |
| SG453     | 50                  | 0                   | 50             | 2              | SG339  | SG346  | SG339                       | SG314                       | WT/s                      | Rep2      |
| SG441     | 47                  | 0                   | 47             | 5              | SG339  | SG356  | SG339                       | SG307                       | WT/s                      | Rep2      |
| SG459     | 52                  | 0                   | 52             | 0              | SG339  | SG359  | SG339                       | SG330                       | WT/s                      | Rep2      |



49 **Table S8.** Phenotypic segregation analysis of F2 seedling populations. Seeds from a subset  
 50 of individual F1 self-crossed plants were plated on media containing kanamycin. Kanamycin  
 51 sensitivity was visually assessed in 14-day-old seedlings. r: resistant, s: sensitive.

| Selfed F1 individual | Sensitive offspring | Resistant Offspring | Total analyzed | Not germinated | Mother | Father | Ancestral maternal genotype | Ancestral paternal genotype | Replicate | Ancestral phenotype (m/p) |
|----------------------|---------------------|---------------------|----------------|----------------|--------|--------|-----------------------------|-----------------------------|-----------|---------------------------|
| SG391-1              | 50                  | 1                   | 51             | 1              | SG359  | SG350  | SG330                       | SG298                       | Rep1      | s/r                       |
| SG391-2              | 20                  | 31                  | 51             | 1              | SG359  | SG350  | SG330                       | SG298                       | Rep1      | s/r                       |
| SG391-3              | 48                  | 0                   | 48             | 4              | SG359  | SG350  | SG330                       | SG298                       | Rep1      | s/r                       |
| SG391-4              | 46                  | 1                   | 47             | 5              | SG359  | SG350  | SG330                       | SG298                       | Rep1      | s/r                       |
| SG401-1              | 11                  | 40                  | 51             | 1              | SG356  | SG358  | SG307                       | SG310                       | Rep1      | s/r                       |
| SG401-2              | 15                  | 30                  | 45             | 5              | SG356  | SG358  | SG307                       | SG310                       | Rep1      | s/r                       |
| SG401-3              | 9                   | 42                  | 51             | 1              | SG356  | SG358  | SG307                       | SG310                       | Rep1      | s/r                       |
| SG403-1              | 49                  | 2                   | 51             | 1              | SG359  | SG358  | SG330                       | SG310                       | Rep1      | s/r                       |
| SG403-2              | 36                  | 11                  | 47             | 5              | SG359  | SG358  | SG330                       | SG310                       | Rep1      | s/r                       |
| SG403-3              | 50                  | 0                   | 50             | 2              | SG359  | SG358  | SG330                       | SG310                       | Rep1      | s/r                       |
| SG403-4              | 44                  | 3                   | 47             | 5              | SG359  | SG358  | SG330                       | SG310                       | Rep1      | s/r                       |
| SG412-1              | 21                  | 25                  | 46             | 6              | SG350  | SG359  | SG298                       | SG330                       | Rep1      | r/s                       |
| SG412-2              | 44                  | 5                   | 49             | 3              | SG350  | SG359  | SG298                       | SG330                       | Rep1      | r/s                       |
| SG412-3              | 33                  | 16                  | 49             | 3              | SG350  | SG359  | SG298                       | SG330                       | Rep1      | r/s                       |
| SG412-4              | 31                  | 19                  | 50             | 2              | SG350  | SG359  | SG298                       | SG330                       | Rep1      | r/s                       |
| SG440-1              | 41                  | 1                   | 42             | 10             | SG359  | SG350  | SG330                       | SG298                       | Rep2      | s/r                       |
| SG440-2              | 49                  | 0                   | 49             | 3              | SG359  | SG350  | SG330                       | SG298                       | Rep2      | s/r                       |
| SG440-3              | 26                  | 22                  | 48             | 4              | SG359  | SG350  | SG330                       | SG298                       | Rep2      | s/r                       |
| SG440-4              | 49                  | 1                   | 50             | 2              | SG359  | SG350  | SG330                       | SG298                       | Rep2      | s/r                       |
| SG451-1              | 23                  | 25                  | 48             | 4              | SG346  | SG358  | SG314                       | SG310                       | Rep2      | s/r                       |
| SG451-2              | 39                  | 10                  | 49             | 3              | SG346  | SG358  | SG314                       | SG310                       | Rep2      | s/r                       |
| SG451-4              | 19                  | 29                  | 48             | 4              | SG346  | SG358  | SG314                       | SG310                       | Rep2      | s/r                       |
| SG452-1              | 40                  | 9                   | 49             | 3              | SG359  | SG358  | SG330                       | SG310                       | Rep2      | s/r                       |
| SG452-2              | 35                  | 14                  | 49             | 3              | SG359  | SG358  | SG330                       | SG310                       | Rep2      | s/r                       |
| SG452-3              | 41                  | 7                   | 48             | 4              | SG359  | SG358  | SG330                       | SG310                       | Rep2      | s/r                       |
| SG452-4              | 26                  | 24                  | 50             | 2              | SG359  | SG358  | SG330                       | SG310                       | Rep2      | s/r                       |
| SG454-1              | 12                  | 39                  | 51             | 1              | SG369  | SG346  | SG292                       | SG314                       | Rep2      | r/s                       |
| SG454-2              | 9                   | 39                  | 48             | 4              | SG369  | SG346  | SG292                       | SG314                       | Rep2      | r/s                       |
| SG454-3              | 16                  | 36                  | 52             | 0              | SG369  | SG346  | SG292                       | SG314                       | Rep2      | r/s                       |
| SG461-1              | 41                  | 8                   | 49             | 3              | SG350  | SG359  | SG298                       | SG330                       | Rep2      | r/s                       |
| SG461-2              | 50                  | 0                   | 50             | 2              | SG350  | SG359  | SG298                       | SG330                       | Rep2      | r/s                       |
| SG461-3              | 48                  | 1                   | 49             | 3              | SG350  | SG359  | SG298                       | SG330                       | Rep2      | r/s                       |
| SG463-1              | 38                  | 13                  | 51             | 1              | SG358  | SG359  | SG310                       | SG330                       | Rep2      | r/s                       |
| SG463-2              | 41                  | 8                   | 49             | 3              | SG358  | SG359  | SG310                       | SG330                       | Rep2      | r/s                       |
| SG463-3              | 34                  | 10                  | 44             | 8              | SG358  | SG359  | SG310                       | SG330                       | Rep2      | r/s                       |
| SG463-4              | 40                  | 2                   | 42             | 10             | SG358  | SG359  | SG310                       | SG330                       | Rep2      | r/s                       |

52

53

54 **Table S9.** PCR-based Genotyping of selected F2 seedling populations. PCR was performed  
 55 using primers either spanning the insertion site (wild-type) or using a combination of a T-DNA  
 56 specific primer and an endogenous primer (see also **Table S12**). Statistical analysis was  
 57 performed using Chi-Square tests, followed by adjusting the p-values for multiple testing  
 58 (Benjamini-Hochberg).

59

| T-DNA | homozygous | heterozygous | wild type | F1 parent | ChiSq P | FDR  |
|-------|------------|--------------|-----------|-----------|---------|------|
| SG310 | 11         | 17           | 11        | SG463_1   | 0.73    | 0.97 |
| SG310 | 10         | 19           | 11        | SG463_2   | 0.93    | 0.97 |
| SG310 | 12         | 29           | 10        | SG463_3   | 0.57    | 0.96 |
| SG310 | 20         | 18           | 12        | SG463_4   | 0.04    | 0.37 |
| SG310 | 11         | 26           | 14        | SG452_1   | 0.83    | 0.97 |
| SG310 | 11         | 23           | 16        | SG452_2   | 0.52    | 0.92 |
| SG310 | 13         | 28           | 11        | SG452_3   | 0.79    | 0.97 |
| SG310 | 10         | 31           | 10        | SG452_4   | 0.31    | 0.80 |
| SG298 | 9          | 34           | 8         | SG440_1   | 0.06    | 0.37 |
| SG298 | 18         | 25           | 9         | SG440_2   | 0.20    | 0.65 |
| SG298 | 10         | 33           | 9         | SG440_3   | 0.15    | 0.61 |
| SG298 | 11         | 32           | 8         | SG440_4   | 0.16    | 0.61 |
| SG298 | 14         | 23           | 14        | SG412_1   | 0.78    | 0.97 |
| SG298 | 13         | 25           | 14        | SG412_2   | 0.94    | 0.97 |
| SG298 | 10         | 30           | 10        | SG412_3   | 0.37    | 0.80 |
| SG298 | 14         | 31           | 6         | SG412_4   | 0.09    | 0.46 |
| SG330 | 10         | 20           | 6         | SG463_1   | 0.51    | 0.92 |
| SG330 | 7          | 15           | 8         | SG463_2   | 0.97    | 0.97 |
| SG330 | 10         | 16           | 10        | SG463_3   | 0.80    | 0.97 |
| SG330 | 13         | 22           | 9         | SG463_4   | 0.70    | 0.97 |
| SG330 | 7          | 21           | 12        | SG452_1   | 0.51    | 0.92 |
| SG330 | 8          | 20           | 4         | SG452_2   | 0.22    | 0.65 |
| SG330 | 16         | 20           | 5         | SG452_3   | 0.05    | 0.37 |
| SG330 | 4          | 32           | 12        | SG452_4   | 0.02    | 0.37 |
| SG330 | 10         | 26           | 13        | SG440_1   | 0.76    | 0.97 |
| SG330 | 14         | 30           | 7         | SG440_2   | 0.17    | 0.61 |
| SG330 | 11         | 31           | 10        | SG440_3   | 0.38    | 0.80 |
| SG330 | 12         | 28           | 12        | SG440_4   | 0.86    | 0.97 |
| SG330 | 12         | 22           | 13        | SG412_1   | 0.89    | 0.97 |
| SG330 | 20         | 18           | 12        | SG412_2   | 0.04    | 0.37 |
| SG330 | 12         | 27           | 12        | SG412_3   | 0.92    | 0.97 |
| SG330 | 9          | 30           | 11        | SG412_4   | 0.34    | 0.80 |

60

61 **Table S10.** Enrichment of *VANDAL6* and *ATLANTYS3* transposable elements in canonical  
 62 *KEEs* (10 *KEEs*) and ectopic *KEEs* (10 ectopic *KEEs* in *dmd1* mutants (Feng et al., 2014)).  
 63 Monte-Carlo based statistical testing revealed significant enrichment ( $P < 0.0001$ ). Ectopic  
 64 and canonical genomic *KEE* regions were defined as a 40 kb genomic region centered  
 65 around the *KNOT* interaction maxima.

66

| TE family        | in old<br><i>KEEs</i> | in ectopic<br><i>KEEs</i> | Total in<br>genome | % within all<br><i>KEEs</i> |
|------------------|-----------------------|---------------------------|--------------------|-----------------------------|
| <i>VANDAL6</i>   | 19                    | 19                        | 89                 | 43                          |
| <i>ATLANTYS3</i> | 18                    | 12                        | 142                | 21                          |

67

68

69

70 **Table S11.** 4C amplification primers.

| Viewpoint | 4C primer 1             | 4C primer 2             | 1° RS   | 2° RS  | #cycles | annealing |
|-----------|-------------------------|-------------------------|---------|--------|---------|-----------|
| SG261     | TCGAAAGCAACAGACTTTGGA   | CAGTCCAAACAACCTCTCGGA   | HindIII | DpnII  | 26      | 63°C      |
| SG292     | TCTCCATGTTTCGAACAACGT   | TGAAAGAGAGAATCCAAGCAGAG | HindIII | DpnII  | 26      | 63°C      |
| SG298     | TCCGGCTTTCTCGTACTTGT    | TCTTTGTTCTTTGCGATCCGA   | HindIII | TaqI   | 26      | 64°C      |
| SG307     | TCCCCTGTAAGCACAAACAGA   | GTCTTCTGATGTGGCTGCCA    | HindIII | NlaIII | 26      | 63°C      |
| SG310     | TCTTGCTGTCAGGTCAAGCT    | TCGACATGCTACATGATAGAACT | HindIII | DpnII  | 26      | 60°C      |
| SG314     | ACGTCCCTTACCATCACACC    | TGTTGTTGCTTGAACCATTCTT  | HindIII | DpnII  | 26      | 62°C      |
| SG330     | TCTGAAGCATCTCAATCTCTTGC | AGTGCAAATGTTAGGGAGAGTGA | HindIII | DpnII  | 26      | 65°C      |
| SG333     | TTTCTGCTCTTGCTTCTCTGA   | GGTGTGAGACTTAACGCAACA   | HindIII | TaqI   | 26      | 65°C      |
| KEE6      | TCTCTGTTCTCAAAAGAGCAAAC | TGCCGTTATTCAATTTCCCG    | HindIII | DpnII  | 29      | 65°C      |

71

72 **Table S12.** Genotyping primers. RP and LP primers bind to genomic DNA sequence,  
73 whereas the RB primer binds to the right border of the *T-DNA* transgene.

| Parental | RP                     | LP                      | RB                   |
|----------|------------------------|-------------------------|----------------------|
| SG261    | TCCAACACAGAACTTGGTCC   | ACTCTCTGGACTTGCATTGC    | ATTTTGCCGATTTTCGGAAC |
| SG292    | AGATACAGTTTTGTCTGGGTCG | TCCATGGAATAAGAGAAAAGAGC | ATTTTGCCGATTTTCGGAAC |
| SG298    | ATGTGAGCTAGGCCTTAAGCC  | TTTGAAACATCACAGCGAGTG   | ATTTTGCCGATTTTCGGAAC |
| SG307    | CCTTTGGTTATGCGAAATGAG  | CAAGAAACAAAGCACTGCAAAC  | ATTTTGCCGATTTTCGGAAC |
| SG310    | TCTTGAACCTCATGTTCCAGG  | TTTAACTTCTTGTCTGCGAAGG  | ATTTTGCCGATTTTCGGAAC |
| SG314    | AAACCACATTGAGATTGCTGG  | GAACTTGATGATTGCTCAGGG   | ATTTTGCCGATTTTCGGAAC |
| SG330    | CCTCGTCTTCGACATAACTGG  | AACTTACCAATCCCATCGACC   | ATTTTGCCGATTTTCGGAAC |
| SG333    | CGGATCAGAACTCTTGCTTG   | GAGAGAACAAGCGGTGTTGAC   | ATTTTGCCGATTTTCGGAAC |

74

75 **Table S13.** Genomic positions of *KEEs*. *KEE* start and end positions are estimates based on  
76 the highest peak of interaction between *KEEs*.

| KEE ID | Chromosome | Start (bp) | End (bp) | Estimated Center (bp) |
|--------|------------|------------|----------|-----------------------|
| KEE01  | Chr1       | 7051324    | 7091324  | 7071324               |
| KEE02  | Chr2       | 4116555    | 4156555  | 4136555               |
| KEE03  | Chr3       | 1951581    | 1991581  | 1971581               |
| KEE04  | Chr3       | 3101455    | 3141455  | 3121455               |
| KEE05  | Chr3       | 16697396   | 16737396 | 16717396              |
| KEE06  | Chr3       | 22560488   | 22600488 | 22580488              |
| KEE07  | Chr4       | 11186537   | 11226537 | 11206537              |
| KEE08  | Chr4       | 15421465   | 15461465 | 15441465              |
| KEE09  | Chr5       | 4780379    | 4820379  | 4800379               |
| KEE10  | Chr5       | 10311725   | 10351725 | 10331725              |

77

78 **Table S14.** Droplet digital PCR primer and probe sequences.

| Target | Primer 1                                           | Primer 2                     | MGB probe                 | Probe labeling |
|--------|----------------------------------------------------|------------------------------|---------------------------|----------------|
| FIE    | TAGCAAAGCGGTAAATATCACG<br>CAACGCTTCTAATTCGATTAGAGG | TGAAGTTCTAAGTGTGGTGAGCC<br>A | TTCAAATAAGATGGTTCCTT<br>A | VIC            |
| LYS    | T                                                  | GAGCGAAACCCGCATATCC          | ACCATCGGCGATAAA           | FAM            |
| KAN    | CGATGAATCCAGAAAAGCGG                               | GCTCCTGCCGAGAAAGTATCC        | CGCCATGGGTCCAG            | FAM            |

79

80

81

82 **Table S15.** Bisulfite sequencing, PCR primers.

| Target      | Primer 1                      | Primer 2                      |
|-------------|-------------------------------|-------------------------------|
| nosP_bisSeq | GATTATTTGGATTGAGAGTGAATATGAG  | TACCCRCCAATATATCCTRTCAAACACT  |
| ChrC_bisSeq | AGAATAAATTAGAAAAGGTGGGGGGGGGG | CCTCCTTTRATTTATRATTCACCTCAATC |

83

84 **Table S16.** Plant lines

| Parental | SALK_ID             | NASC_ID | Chrom | Start       | End         | F1                |
|----------|---------------------|---------|-------|-------------|-------------|-------------------|
| SG261    | SALK_126675         | N626675 | Chr1  | 22642823.00 | 22642938.00 | SG261/SG368/SG371 |
| SG292    | SALK_140062.52.80.x | N640062 | Chr1  | 7458618.00  | 7458855.00  | SG335/SG337/SG369 |
| SG298    | SALK_112176.43.75.x | N612176 | Chr1  | 22625361.00 | 22625833.00 | SG350/SG361/SG362 |
| SG307    | SALK_131115.49.60.x | N631115 | Chr1  | 2952334.00  | 2952784.00  | SG342/SG355/SG356 |
| SG310    | SALK_061571.55.25.x | N561571 | Chr1  | 12964622.00 | 12965035.00 | SG340/SG358       |
| SG314    | SALK_056646.52.10.x | N556646 | Chr1  | 2085299.00  | 2085689.00  | SG346/SG354/SG357 |
| SG330    | SALK_030202.56.00.x | N530202 | Chr1  | 26951796.00 | 26951870.00 | SG352/SG353/SG359 |
| SG333    | SALK_058485.56.00.x | N558485 | Chr1  | 17053813.00 | 17054246.00 | SG366/SG367/SG373 |
| SG339    | NA                  | N60000  | WT    | WT          | WT          | SG339             |

85

86 **Table S17.** Aligned read numbers and culture identifiers for all individual 4C experiments.

| Viewpoint | aligned reads | 4C_replicate | seedling population ID (F1) |
|-----------|---------------|--------------|-----------------------------|
| KEE6      | 23189023      | KEE6_314     | SG354                       |
| KEE6      | 21223451      | KEE6_330     | SG352                       |
| SG261     | 9685774       | SG261_Rep1   | SG261                       |
| SG261     | 1378433       | SG261_Rep3   | SG368                       |
| SG261     | 6521728       | SG261_Rep5   | SG371                       |
| SG261     | 5405450       | SG261_WT1    | SG339A                      |
| SG261     | 5784999       | SG261_WT2    | SG339B                      |
| SG261     | 5735150       | SG261_WT3    | SG339C                      |
| SG292     | 9913713       | SG292_Rep2   | SG335                       |
| SG292     | 11091572      | SG292_Rep3   | SG337                       |
| SG292     | 5100516       | SG292_Rep4   | SG369                       |
| SG292     | 18036257      | SG292_WT1    | SG339A                      |
| SG292     | 17736274      | SG292_WT2    | SG339B                      |
| SG292     | 21479020      | SG292_WT3    | SG339C                      |
| SG298     | 29828444      | SG298_Rep1   | SG350                       |
| SG298     | 17469105      | SG298_Rep2   | SG361                       |
| SG298     | 16456891      | SG298_Rep3   | SG362                       |
| SG298     | 12474547      | SG298_WT1    | SG339A                      |
| SG298     | 3740262       | SG298_WT2    | SG339B                      |
| SG298     | 4485737       | SG298_WT3    | SG339C                      |
| SG307     | 19553437      | SG307_Rep4   | SG342                       |
| SG307     | 14139550      | SG307_Rep5   | SG355                       |
| SG307     | 17357628      | SG307_Rep6   | SG356                       |
| SG307     | 15779267      | SG307_WT4    | SG339A                      |
| SG307     | 20777186      | SG307_WT5    | SG339B                      |
| SG307     | 8076430       | SG307_WT6    | SG339C                      |
| SG310     | 5530946       | SG310_Rep1   | SG340*                      |
| SG310     | 5932068       | SG310_Rep3   | SG358                       |
| SG310     | 10531730      | SG310_Rep6   | SG340*                      |
| SG310     | 1556512       | SG310_WT1    | SG339A                      |
| SG310     | 3414811       | SG310_WT2    | SG339B                      |
| SG310     | 7693095       | SG310_WT3    | SG339C                      |
| SG314     | 16360973      | SG314_Rep1   | SG346                       |
| SG314     | 24693231      | SG314_Rep2   | SG354                       |
| SG314     | 15137004      | SG314_Rep3   | SG357                       |
| SG314     | 19053104      | SG314_WT1    | SG339A                      |
| SG314     | 7230100       | SG314_WT2    | SG339B                      |
| SG314     | 20987454      | SG314_WT3    | SG339C                      |
| SG330     | 19703711      | SG330_Rep2   | SG352                       |
| SG330     | 22296675      | SG330_Rep3   | SG353                       |
| SG330     | 23976923      | SG330_Rep4   | SG359                       |
| SG330     | 6295082       | SG330_WT1    | SG339A                      |
| SG330     | 7935708       | SG330_WT2    | SG339B                      |
| SG330     | 26324223      | SG330_WT3    | SG339C                      |
| SG333     | 22901701      | SG333_Rep2   | SG366                       |
| SG333     | 16657521      | SG333_Rep3   | SG367                       |
| SG333     | 24261975      | SG333_Rep5   | SG373                       |
| SG333     | 8652969       | SG333_WT1    | SG339A                      |
| SG333     | 16823014      | SG333_WT2    | SG339B                      |
| SG333     | 26660207      | SG333_WT3    | SG339C                      |

87  
88  
89  
90  
91  
92  
93  
94  
95

**Table S18.** mRNA sequencing alignment scores

| Seedling population ID (F1) | Parental | Aligned reads |
|-----------------------------|----------|---------------|
| SG335                       | SG292    | 44403631      |
| SG337                       | SG292    | 30517913      |
| SG339B                      | SG339    | 26522720      |
| SG339C                      | SG339    | 29785015      |
| SG339A                      | SG339    | 31035192      |
| SG340A                      | SG310    | 30258520      |
| SG340B                      | SG310    | 32174764      |
| SG342                       | SG307    | 32013397      |
| SG346                       | SG314    | 26445754      |
| SG350                       | SG298    | 34331765      |
| SG352                       | SG330    | 35278271      |
| SG353                       | SG330    | 36861323      |
| SG354                       | SG314    | 32518373      |
| SG355                       | SG307    | 35669341      |
| SG356                       | SG307    | 22944868      |
| SG357                       | SG314    | 23740897      |
| SG358                       | SG310    | 23620741      |
| SG359                       | SG330    | 23915939      |
| SG362                       | SG298    | 33649195      |
| SG366                       | SG333    | 27055650      |
| SG367                       | SG333    | 35093779      |
| SG369                       | SG292    | 31740768      |
| SG373                       | SG333    | 35911536      |

**Table S19.** sRNA sequencing alignment scores

| Seedling population ID (F1) | reads before filtering | reads after filtering | aligned reads |
|-----------------------------|------------------------|-----------------------|---------------|
| SG261                       | 7396436                | 1405063               | 1311965       |
| SG335                       | 8177634                | 1344447               | 1238617       |
| SG337                       | 8334956                | 1733957               | 1613459       |
| SG339A                      | 5436747                | 1070151               | 1000903       |
| SG339B                      | 8664199                | 1577092               | 1469234       |
| SG339C                      | 4745576                | 1714664               | 1642939       |
| SG340                       | 8472017                | 2001790               | 1876065       |
| SG342                       | 8945031                | 1698366               | 1575524       |
| SG346                       | 9513091                | 1945791               | 1816128       |
| SG350                       | 9450975                | 1717736               | 1592063       |
| SG352                       | 9623763                | 2063716               | 1944699       |
| SG353                       | 5413341                | 1720001               | 1638880       |
| SG354                       | 7867937                | 1583755               | 1475920       |
| SG355                       | 7854309                | 1731756               | 1620929       |
| SG356                       | 9235330                | 1894159               | 1765857       |
| SG357                       | 7062132                | 1779930               | 1680265       |
| SG358                       | 8040484                | 1527851               | 1428155       |
| SG359                       | 6522046                | 994509                | 923212        |
| SG361                       | 8571275                | 1559719               | 1453043       |
| SG362                       | 6945679                | 1321023               | 1226693       |
| SG368                       | 7695337                | 1605855               | 1503031       |
| SG369                       | 10390466               | 2234459               | 2014860       |
| SG371                       | 6860356                | 1399405               | 1308957       |

Figure S1

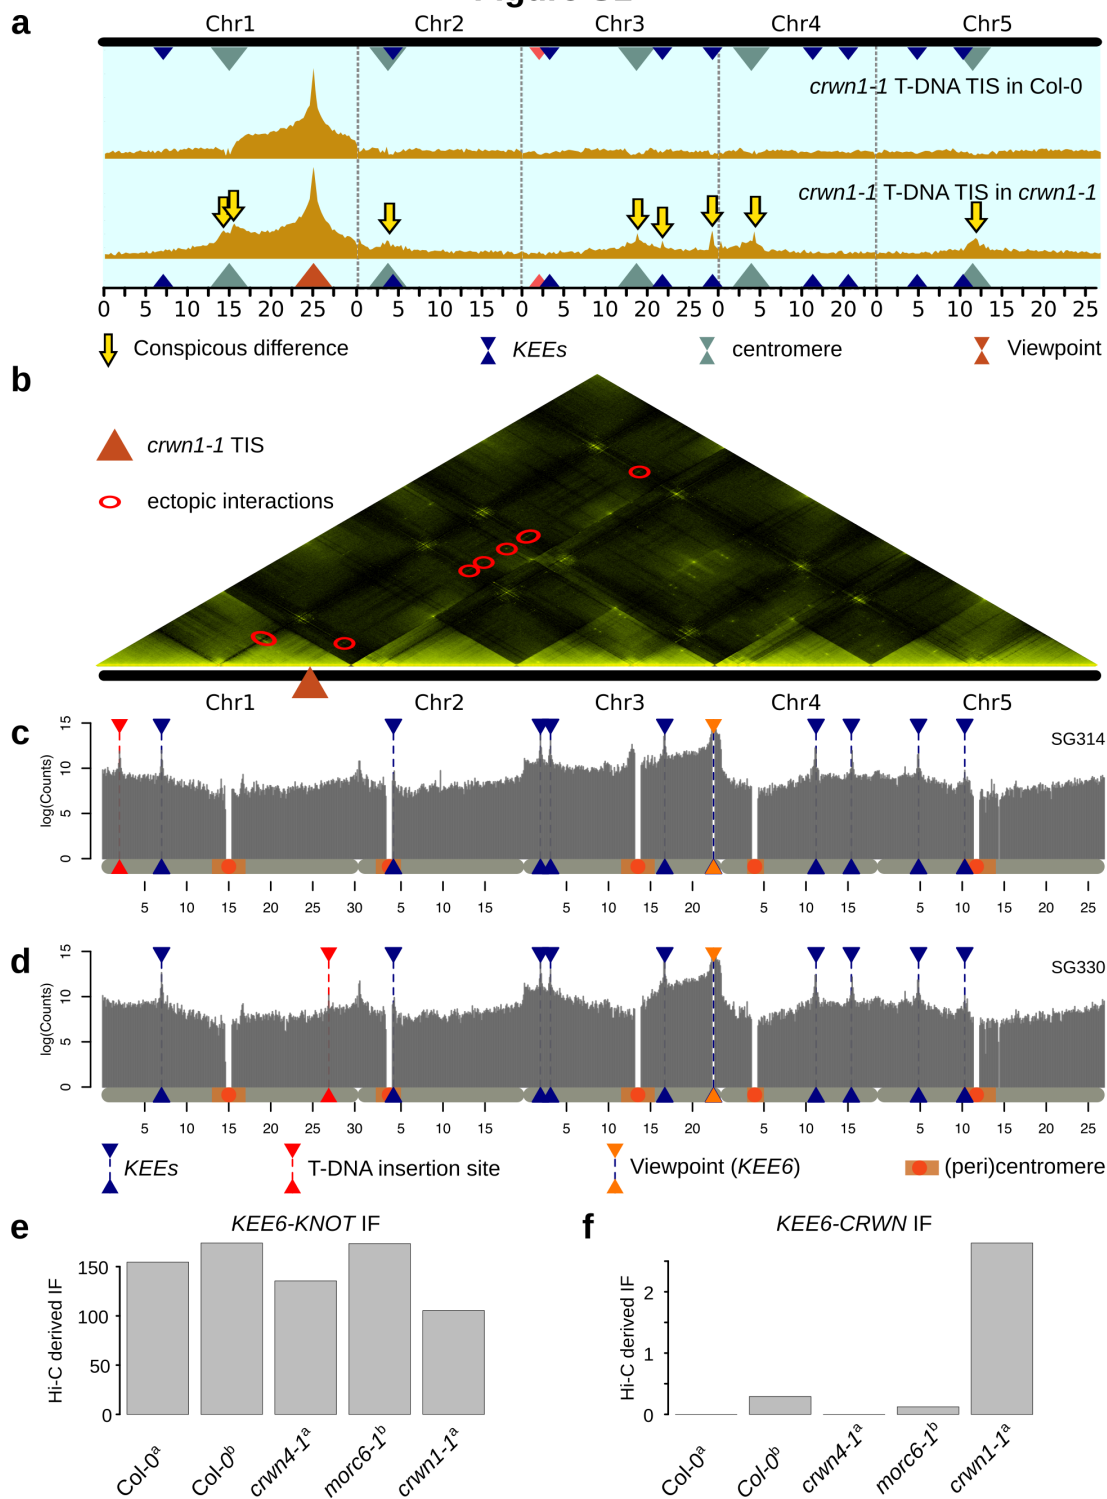97  
98

99 **Supplemental Figure S1. a)** Virtual 4C profile setting the *crwn1-1* TIS as a viewpoint. Top: *in*  
 100 *silico* 4C profile extracted from the Col-0 wild-type Hi-C data set. Bottom: *in silico* 4C profile  
 101 extracted from *crwn1-1* Hi-C data set (Grob et al., 2014). Bin size: 50 kb. Conspicuous  
 102 differences between transgenic and wild-type virtual 4C profiles are marked with yellow  
 103 arrows. **b)** Ectopic *KEEs* in *crwn1-1* shown in a Hi-C triangular plot (bin size: 100kb). **c)** 4C  
 104 profile of viewpoint *KEE6* in SG314. **d)** 4C profile of viewpoint *KEE6* in SG330 **e)** Hi-C  
 105 derived IFs between *KEE6* and all other *KEEs* in various genotypes. **f)** Hi-C derived IFs  
 106 between *KEE6* and the *CRWN1* locus. Genotypes in **e)** and **f)** (Grob et al., 2014; Moissiard et  
 107 al., 2012), bin size: 50 kb.

Figure S2

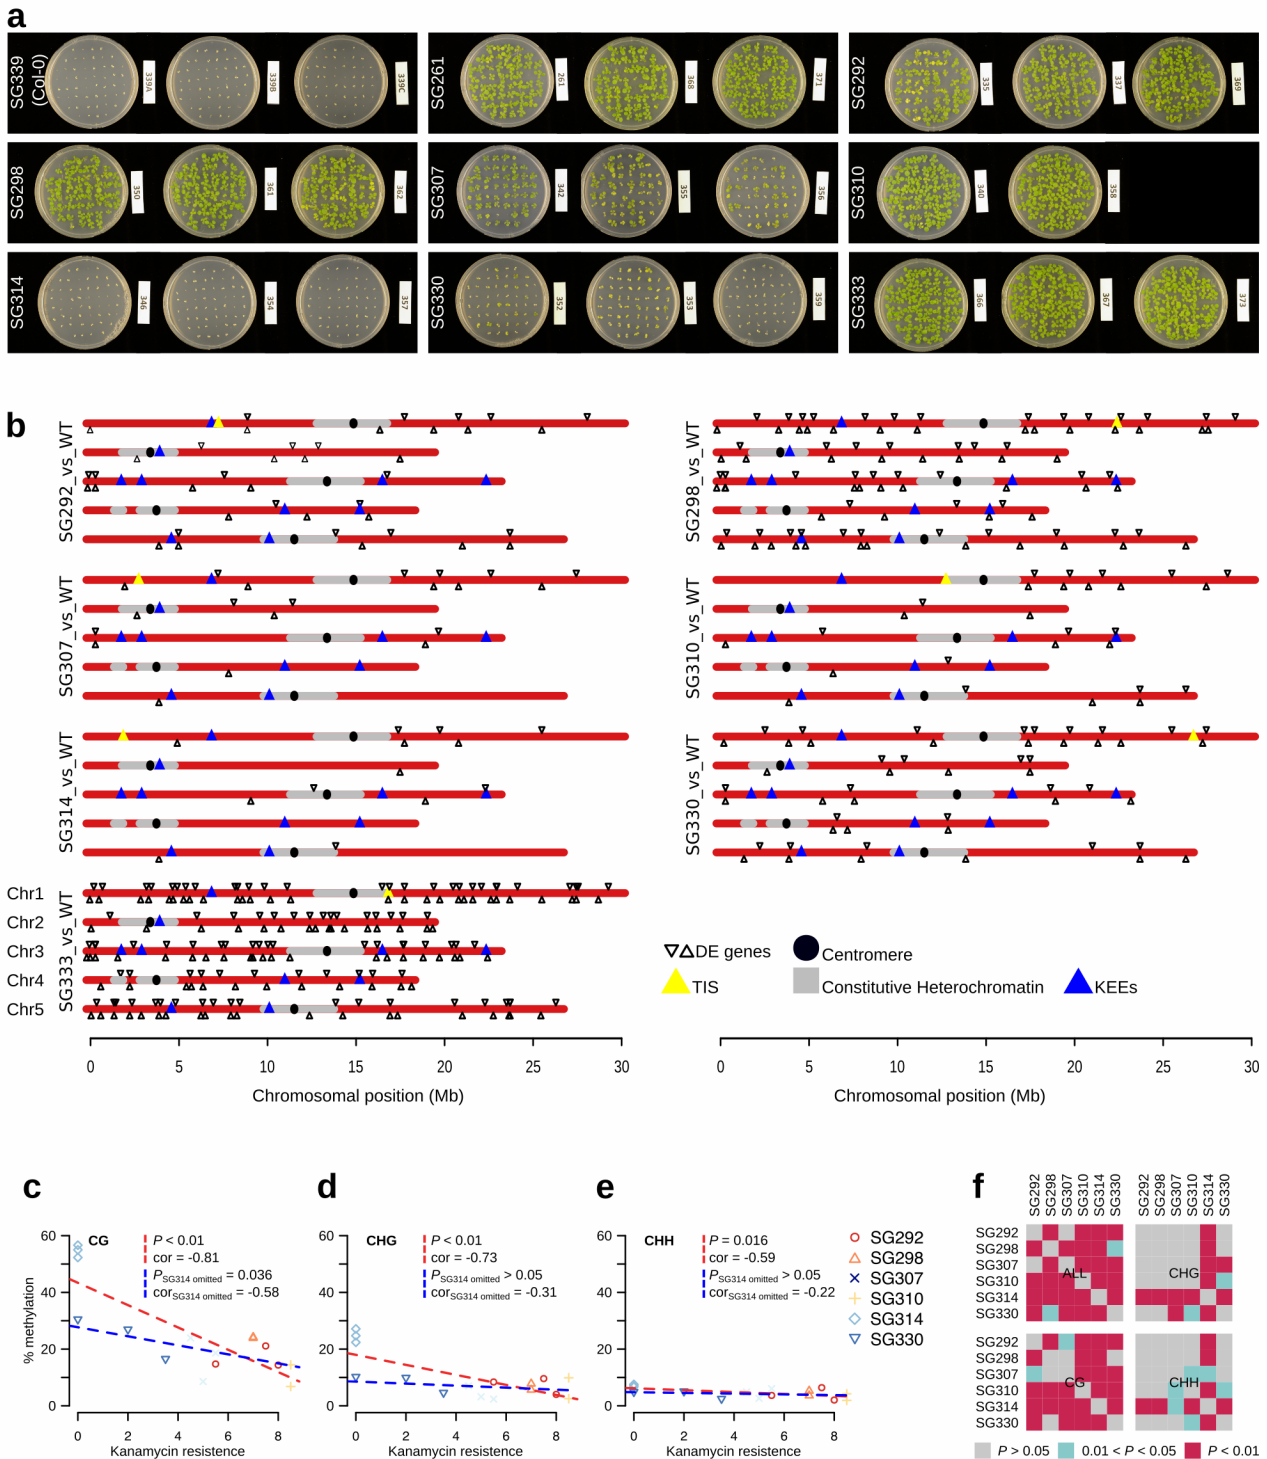

108

109 **Supplemental Figure S2. a)** Kanamycin resistance assay. 14-day-old seedlings grown on  
 110 medium containing kanamycin. Parental line identified is indicated on the left. **b)** RNA  
 111 sequencing results. Differential expression analysis between transgenic (in triplicate) and  
 112 Col-0 wild-type lines (in triplicate). Differentially expressed genes (FDR < 0.05) are marked  
 113 with empty black triangles. **c) - f)** Pearson's correlation analysis between kanamycin  
 114 resistance phenotype and *nosP* methylation levels. **c)** CG context, **d)** CHG context, **e)** CHH  
 115 context. Red dashed lines show correlation including all six transgenic lines, blue dashed  
 116 lines omit SG314 in analysis. **f)** Summary of significance of cross-wise Chi-square testing  
 117 between transgenic lines, split for individual mC contexts.

118

**Figure S3**

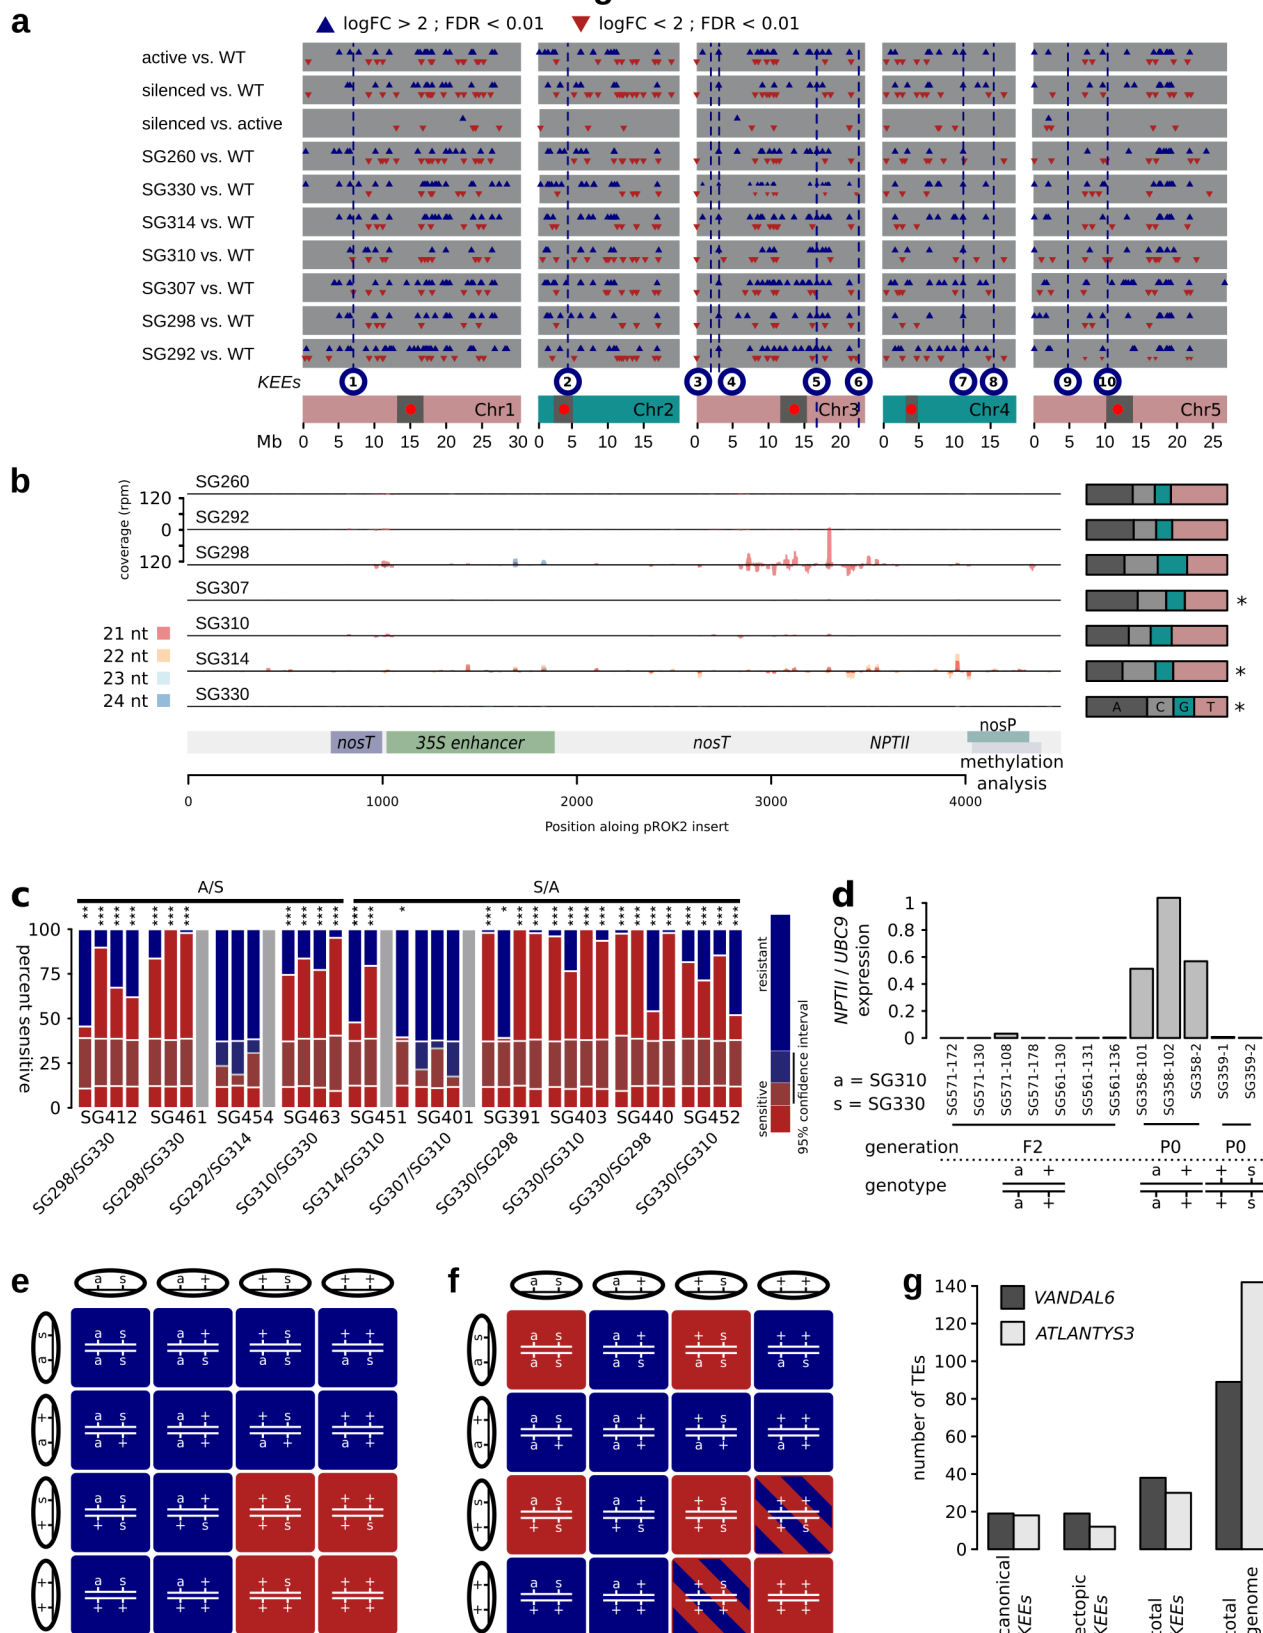

119  
 120

121 **Supplemental Figure S3. a)** sRNA-seq overview on various contrasts for which differential  
 122 analysis was performed. Genomic bins (1 kb) associated with significant changes ( $\log_{2}FC > 2$ ;  
 123  $FDR < 0.01$ ) are shown as triangles (blue, upregulation; red, downregulation). **b)** Distribution  
 124 of sRNA-seq sequencing reads in 10 bp bins (21 nt - 24 nt) mapping to the vector *pROK2*.  
 125 Read numbers were normalized for *pROK2* copy number. The reads of the three biological  
 126 replicates were pooled. Right: Summary of first nucleotides of the reads. Asterisks mark



127 significant deviations from equal distribution of nucleotides (Chi-Sq test,  $P < 0.05$ ). **c)**  
128 Representation of the segregation analysis of F2 seedling populations from individual F1  
129 mothers. Chi-square tests were performed to test for deviation from Mendelian segregation  
130 (Null-hypothesis: 0.25/0.75 (sensitive/resistant), \*:  $0.05 > P \geq 0.01$ , \*\*:  $0.01 > P \geq 0.001$ , \*\*\*:  
131  $P < 0.001$ ). Confidence interval indicates the range, in which Mendelian segregation cannot  
132 be rejected. A: active ancestral phenotype, S: silenced ancestral phenotype. **d)** Kanamycin  
133 expression in F2 and parental P0 plants assessed by ddPCR. **e)** Expected genotype-  
134 phenotype relationship assuming Mendelian segregation of phenotypes in the F2 generation.  
135 **f)** Expected genotype-phenotype relationship assuming a dosage effect of an interfering  
136 small RNA produced by the s locus. sRNA dosage may explain, why in the F1 generation  
137 (silenced allele in hemizygous state) no *trans*-silencing effect can be observed but only in the  
138 F2 generation. However, ratios higher than the expected ratio of kanamycin sensitive to  
139 kanamycin resistant (5/16 – 7/16) can be observed in the F2 generation (see **c**)) a: active  
140 allele, s: silenced allele, circles: maternal (top) and paternal (left) gametes, red: kanamycin  
141 sensitive phenotype, blue: kanamycin resistant phenotype. **g)** Abundance of *VANDAL6* and  
142 *ATLANTYS3* TEs in canonical and ectopic (induced by *ddm1* - (Feng et al., 2014)) *KEEs*.  
143

**Figure S4**

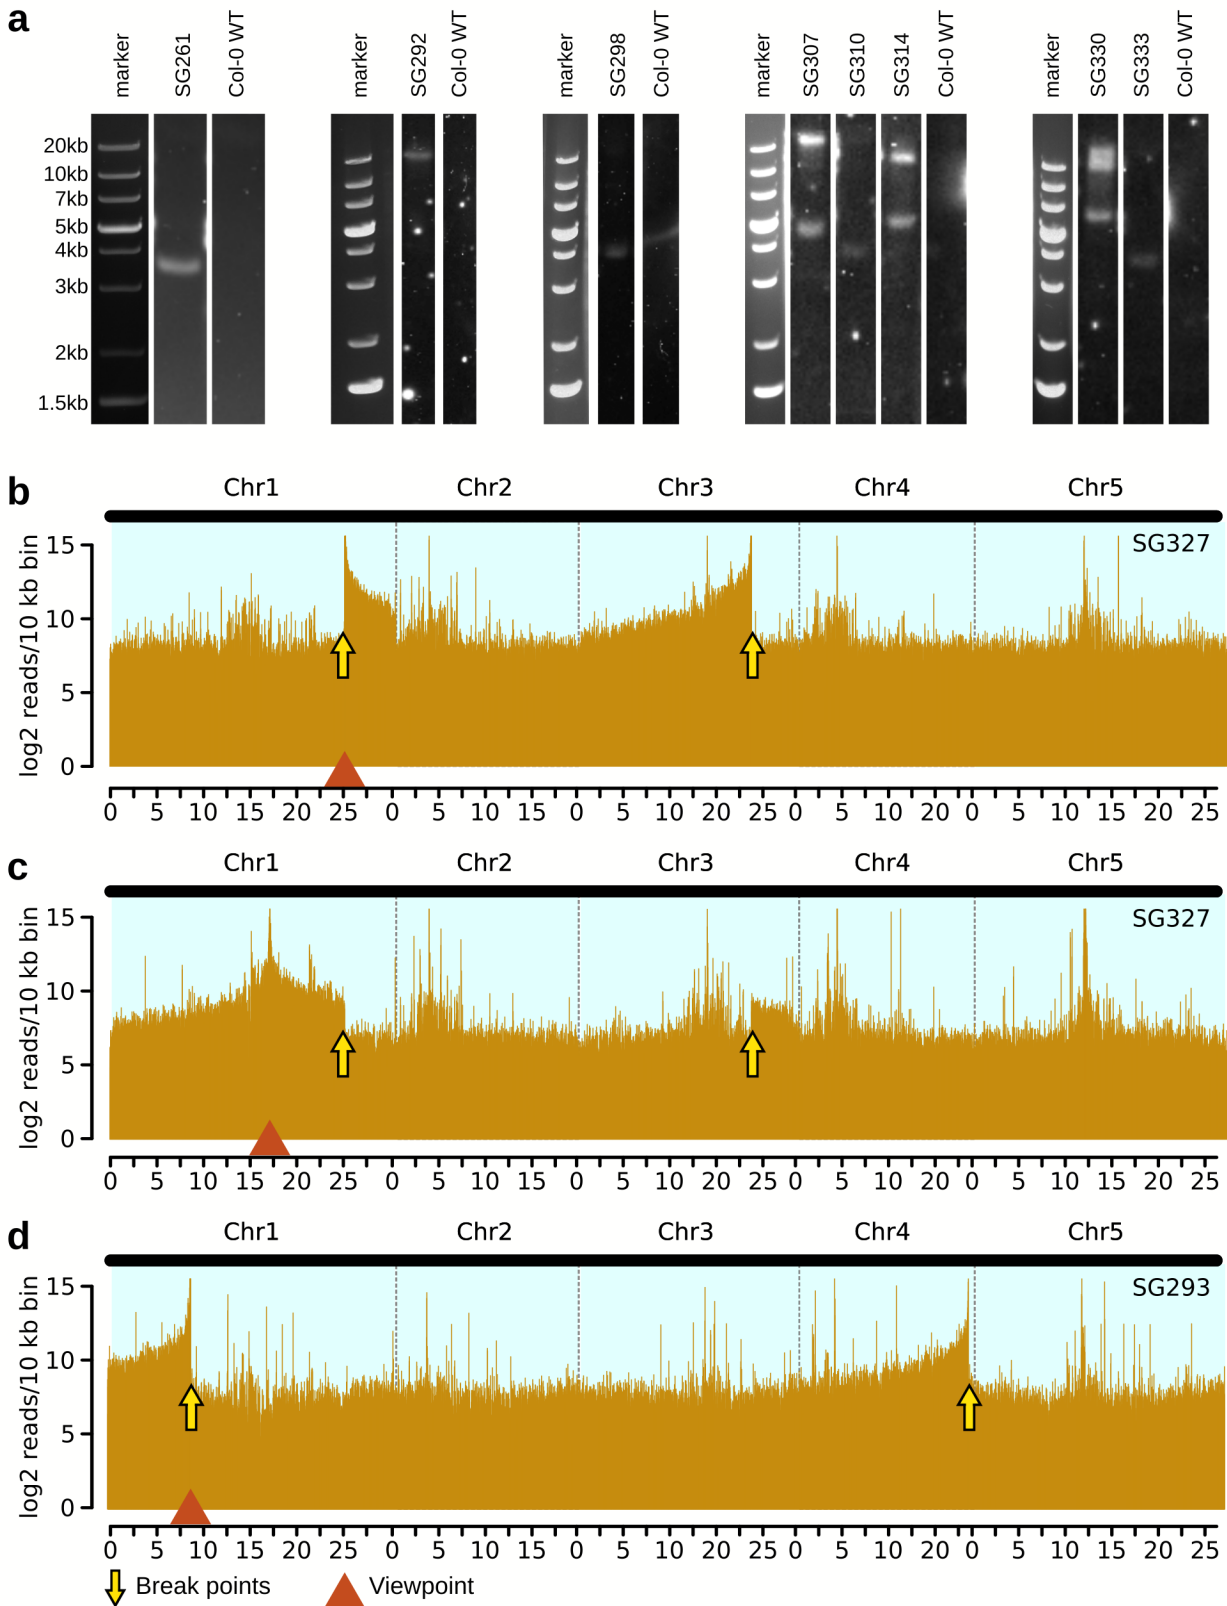

144

145 **Supplemental Figure S4. a)** Southern blot results. Single lanes have been cropped from  
 146 images containing multiple lanes. DNA of plant samples non-relevant for the present study  
 147 where loaded on these lanes. **b)-c)** Detection of translocations by 4C. **b)** 4C interaction  
 148 frequencies from a viewpoint in close proximity of the TIS of SG327. A translocation occurred  
 149 between chromosome 1 and chromosome 3. **c)** 4C interaction profile obtained from the same  
 150 transgenic line as in B) with a different viewpoint. **d)** 4C interaction frequencies from a  
 151 viewpoint in proximity of the TIS of SG293. A translocation occurred between chromosome 1  
 152 and chromosome 4.

## 153 **Data Availability**

154 4C and RNA, and sRNA sequencing data are publicly available at the Short Read  
155 Archive (SRA; <https://www.ncbi.nlm.nih.gov/sra/>) under accession SRP126992. Codes for  
156 data processing and analysis are available upon request.

## 157 **Material and Methods**

### 158 **Plant Material**

159 Seeds of transgenic *Arabidopsis thaliana* lines were acquired through the European  
160 Arabidopsis Stock Center (NASCC) (<http://arabidopsis.info/>) (**Table S16**). All parental lines  
161 were genotyped and homozygous individual were selected and selfed to produce F1 seeds.  
162 Plants were grown under long-day conditions (16h light, 8 hours dark, 22°C day, 18°C night).  
163 Seeds were sterilized using hypochloric acid and stratified for 2 days at 4°C. All plant material  
164 used in this study stems from 14-day-old seedlings cultivated as previously described (Grob  
165 et al., 2013). All analyzed Arabidopsis lines are in the Columbia-0 (Col-0) accession.

### 166 **4C experiments**

167 Generation of 4C templates was performed as previously described (Grob et al.,  
168 2013). To minimize technical biases, we placed the 4C viewpoints adjacent to the *TIS* on  
169 endogenous DNA sequence; thus, the 4C template enrichment could be performed using  
170 identical primer pairs in transgenic and wild-type 4C samples. All 4C experiments were  
171 performed in biological triplicates. Primer sequences and restriction enzymes used in the 4C  
172 experiments are indicated in **Table S11**. 4C sequencing reads were aligned using bowtie  
173 (Langmead et al., 2009) with the parameters -a -v 0 -m 25 (no mismatches allowed, multiple  
174 alignments allowed). Alignment scores, plant lineage, and 4C replicate information are  
175 summarized in **Table S17**. Reads with multiple alignments were weighted using Rcount-  
176 multireads (Schmid and Grossniklaus, 2015). Weighted reads were mapped to individual  
177 restriction fragments using HiCdat (Schmid et al., 2015), yielding tables describing the  
178 number of reads, and thus interaction frequencies (IFs) per individual *HindIII* restriction  
179 fragment. The IFs were subsequently allocated to non-overlapping 100 kb genomic bins. IFs  
180 were further processed using edgeR (Robinson et al., 2010) to determine count data (log  
181 count per million) and to perform differential analysis between transgenic and wild-type 4C  
182 interaction profiles, comprising of 3 biological replicates each. For this, count data was  
183 normalized for library sizes (edgeR: `calcNormFactors()`), followed by estimating common and  
184 tag-wise dispersion (edgeR: `estimateCommonDisp()` and `estimateTagwiseDisp()`). Differential  
185 analysis was then performed using the exact test (edgeR: `exactTest()`). Significant

186 differences in IFs between transgenic and WT data sets were defined by a false discovery  
187 rate (FDR) < 0.05 (using Benjamini-Hochberg adjusted *P*-values).

## 188 **HiC data and virtual 4C analysis**

189 Previously published Hi-C interaction data (Grob et al., 2014) were processed as  
190 previously described (Grob et al., 2014). Hi-C snapshots were taken from regions of interest  
191 using a 50 kb (**Figure 1B**) and 100 kb (**Figure 1A**) binning size. Virtual 3C and 4C analysis  
192 (see **Figure S1A** and **Figure 3F**) was performed by extracting the genomic 100 kb bin  
193 relevant to the viewpoint of interest (*crwn1-1*: Chr1 25.1 – 25.2 Mb (**Figure S1A**) or summing  
194 up Hi-C interaction frequencies between TIS and bins (100 kb) encompassing *KEEs* and  
195 pericentromeres (**Figure 3F**; *KEE1* and the pericentromere of chromosome 1 were omitted).  
196 To determine *KEE6-KNOT* contact frequencies, IFs were extracted from previously published  
197 Hi-C matrices at 50 kb resolution (Grob et al., 2014; Moissiard et al., 2012), without using  
198 distance normalization. *KEE6-KNOT* IFs were defined as contact frequencies between *KEE6*  
199 and *KEE1*, *KEE2*, *KEE3*, *KEE4*, *KEE5*, *KEE7*, *KEE8*, *KEE9*, and *KEE10*.

## 200 **Copy number analysis**

201 The copy numbers of inserted transgenes were assessed using Southern blot analysis  
202 and droplet digital PCR. DNA for both types of analysis was extracted from 14-day-old  
203 Arabidopsis seedlings using a MasterPure DNA purification kit (Epicentre, Madison, WIS,  
204 USA).

### 205 **a) Southern blot**

206 For Southern blot analysis genomic DNA was digested using the *HindIII* restriction  
207 enzyme (New England Biolabs, Ipswich, MA, USA). The digestion efficiency was analyzed on  
208 1.5% agarose gel. Subsequently, the gel was washed for 10 min in 0.25 M HCl, followed by  
209 15 min incubation in denaturation solution (1.5 M NaCl, 0.5 N NaOH) and 15 min incubation  
210 in neutralization solution (1.5 M NaCl, 1 M TrisHCl, pH 7.5). The fragmented and denatured  
211 DNA was then transferred to a positively charged nylon membrane (Roche, Basel,  
212 Switzerland) overnight at room temperature (RT). After rinsing the nylon membrane in 2x  
213 SSC buffer, the DNA was UV crosslinked (GS cross linker BioRad (BioRad, Hercules, CA,  
214 USA)). The membrane was then placed in a glass cylinder and incubated in 15 ml of  
215 hybridization solution (DIG Easy Hyb Granules, Roche, Basel, Switzerland) for 5 hrs at 42°C  
216 under constant rotation. Following pre-hybridization, the membrane was incubated in 15 ml of  
217 fresh hybridization solution containing 8 µl of Salmonsperm-DNA and 5 µl of digoxigenin  
218 (DIG)-labeled probe (generated by incorporation of DIG-labeled dUTP (Roche, Basel,  
219 Switzerland)) at 42°C overnight. The next day, the membrane remaining in the glass cylinder  
220 was washed 2x with W1 (2x SSC, 0.1 % SDS) for 5 min at 68°C, followed by 15 min washing

221 in W2 (0.2x SSC, 0.1 % SDS) at 68°C, and 15 min in W3 (0.1x SSC, 0.1 % SDS).  
222 Subsequently, the membrane was transferred to a plastic tray and incubated at RT in WB  
223 (100 mM maleic acid, 150 mM NaCl, 0.3 % Tween-20, pH 7.5), followed by 30 minutes in B2  
224 (2 g Roche Blocking Reagent (Roche, Basel, Switzerland) in 200 ml B1 (100 mM maleic acid,  
225 150 mM NaCl, pH 7.5)). Then, 1.5 µl anti-DIG-alkaline phosphatase conjugate (Roche, Basel,  
226 Switzerland) in 50 ml B2 was added and the membrane was incubated for 30 min. The  
227 membrane was washed 3x for 40 min in WB and then incubated for 5 min in B3 (100 mM  
228 TrisHCl, 100 mM NaCl, 50 mM MgCl<sub>2</sub>, pH 9.5). Finally, the membrane was overlaid with 6 ml  
229 of substrate solution (60 µl CDP Star (Roche, Basel, Switzerland) in 6 ml B3) and  
230 subsequently exposed in a trans-illuminator (Biorad Chemidoc XRS, (BioRad, Hercules, CA,  
231 USA)). Image acquisition was conducted after 10'000 sec of exposure.

### 232 **b) Droplet digital PCR**

233 Droplet digital PCR (ddPCR) was performed to quantify *NPTII* (and thus transgene)  
234 copy number using a Biorad QX200 Droplet Digital PCR system (BioRad, Hercules, CA,  
235 USA). The concentration of *NPTII* (transgene), *FIE* (AT3G20740; endogenous single copy  
236 gene), and *LYS* (AT5G62150; endogenous single copy gene) was assessed using 2 ng of  
237 input genomic DNA. The rounded average between *NPTII*/*FIE* and *NPTII*/*LYS* ratios was  
238 finally used to determine the *NPTII* copy number. Droplet generation was performed  
239 according to the manufacturer's protocol. Following droplet generation, the templates were  
240 amplified in a T100 thermal cycler (BioRad, Hercules, CA, USA). Fluorescence reads of the  
241 individual droplets were analyzed using Quanta Soft v1.7 (BioRad, Hercules, CA, USA). For  
242 each sample and probe, experiments were performed in technical duplicates. Primer and  
243 probe sequence information are shown in **Table S14**. Probes were custom designed and  
244 acquired from Life Technologies (Life Technologies, ThermoFisher Scientific, Waltham, MA,  
245 USA).

### 246 **mRNA sequencing**

247 RNA was extracted from 14-day-old Arabidopsis seedlings using RNeasy Plant Mini  
248 Kit (Qiagen, Venlo, Netherlands). RNA was extracted from three F1 seedling populations per  
249 following parental plant lines: SG339 (wild type), SG292, SG298, SG307, SG310, SG314,  
250 SG330, and SG333. After library preparation using the Illumina Stranded mRNA RNA-seq  
251 protocol, total RNA was subjected to Illumina RNA sequencing (RNAseq). RNAseq reads  
252 were aligned using the subjunc (Liao et al., 2013) RNA sequencing reads alignment program.  
253 The numbers of valid alignments are shown in **Table S18**. Aligned RNAseq reads were then  
254 weighted and mapped to individual transcriptional units (genes, TEs) using Rcount (Schmid  
255 and Grossniklaus, 2015). The preprocessed transcription data was analyzed using the edgeR  
256 (Robinson et al., 2010) differential expression (DE) analysis program. DE was analyzed for

257 two types of contrasts: i) individual parental transgenic lines (using three F1 seedling  
258 populations) versus Col-0 WT, and ii) all combined transgenic lines versus WT. To analyze  
259 DE, we chose a standard approach using general linearized models. After estimating  
260 common and trended (edgeR: estimateGLMCommonDisp() and estimateGLMTrendedDisp())  
261 dispersion we applied a gene-wise negative binomial generalized linear model (edgeR:  
262 glmfit()), followed by glmLRT()) to assess DE. *P*-values were adjusted according to Benjamini-  
263 Hochberg and DE genes exhibiting adjusted *P*-values < 0.05 were scored as significant.

## 264 **sRNA-seq analysis**

265 Total RNA was extracted from 14-day-old *Arabidopsis* seedlings using the mirVana  
266 miRNA isolation kit (Ambion, ThermoFisher Scientific, Waltham, MA, USA). RNA was  
267 extracted from three F1 seedling populations of the following parental lines: SG339 (Col-0  
268 wild-type; SG339A, SG339B, SG339C), SG260 (SG261, SG368, SG371), SG292 (SG335,  
269 SG337, SG369), SG298 (SG350, SG361, SG362), SG307 (SG342, SG355, SG356), SG310  
270 (SG310, SG340), SG314 (SG346, SG355, SG356), and SG330 (SG352, SG353. SG359).

271 Total RNA was ligated to Illumina sequencing adapters, size selected, and subsequently  
272 sequenced on Illumina HighSeq 2500. The adapters of Illumina sequencing reads were  
273 trimmed using cutadapt (parameters: -m 17 -q 20; adapter sequence:  
274 TGAATTCTCGGGTGCCAAGGAAGTCCAGTCAC). Subsequently, the trimmed reads were  
275 filtered by aligning them against regions encompassing rRNA genes (10 kb surrounding  
276 them, Chr2:1..10000, Chr3:14194000..14204000), tRNA genes, as well as chloroplast and  
277 mitochondrial sequences. The unaligned reads were size selected (17 – 30 bp) using an awk  
278 command, and subsequently aligned to the *Arabidopsis* reference genome (TAIR10) using  
279 bowtie with the following parameters: bowtie -v 2 -best -m 10000 (allowing two mismatches  
280 and up to 10,000 equally best alignments). The aligned sequencing reads were corrected for  
281 multiple alignment using Rcount-multireads, and subsequently binned into 500 bp non-  
282 overlapping genomic bins. Differential analysis was performed using edgeR with the same  
283 parameters as described for differential RNA-seq analyses. To find genomic features  
284 associated with differential 500 bp bins, bedtools (Quinlan and Hall, 2010) intersect has been  
285 employed.

## 286 ***NPTII* expression by ddPCR**

287 Total RNA was extracted using standard the Trizol RNA extraction protocol, followed  
288 by RNA purification using a Direct-zol Micro Prep kit (Zymo Research, CA, USA). To remove  
289 residual DNA, RNA samples were treated with 2U of TURBO DNase following the  
290 manufacturer's protocol (Invitrogen, ThermoFisher Scientific, Waltham, MA, USA). 10 µl (ca.  
291 1 µg) of purified RNA samples were incubated for 10 minutes at 70 °C with 1 µl oligodT, 1 µl  
292 RNase OUT (ThermoFisher Scientific, Waltham, MA, USA). Reverse transcription was

293 performed using SuperScriptII reverse transcriptase, following the manufacturer's protocol  
294 (ThermoFisher Scientific, Waltham, MA, USA). ddPCR was performed amplifying both *NPTII*  
295 transcripts and *UBC9* transcripts as internal control to normalize for different amount of input  
296 material.

## 297 **Methylation analysis**

298 DNA from 14-day-old Arabidopsis seedlings was extracted using a MasterPure DNA  
299 extraction kit (Epicentre, Madison, WIS, USA). The DNA was bisulfite converted using a  
300 EpiTect Bisulfite Kits (Qiagen, Venlo, Netherlands) according to the manufacturer's protocol.  
301 Bisulfite converted DNA was amplified using a Kapa Library Amplification Kit (Kapa  
302 Biosystems, Wilmington, MA, USA). Primer sequences are indicated in **Table S15**. PCR  
303 products (see also **Figure S3B**) were subsequently purified from an agarose gel and cloned  
304 into the pJet1.2 cloning vector (CloneJET PCR cloning Kit, ThermoFisher Scientific,  
305 Waltham, MA, USA), and transformed into DH5 $\alpha$  *E.coli* cells. Subsequently, the extracted  
306 vectors were subjected to Sanger sequencing. The resulting sequences were trimmed and  
307 preprocessed using BISMA (<http://services.ibc.uni-stuttgart.de/BDPC/BISMA/>) (Rohde et al.,  
308 2010). CG, CHG, and CHH methylation levels were assessed using Kismeth  
309 (<http://katahdin.mssm.edu/kismeth/revpage.pl>) (Gruntman et al., 2008). Statistical analysis of  
310 the methylation data was performed as previously described (Henderson et al., 2010; Jullien  
311 et al., 2012). Methylation data of all F1 samples belonging to the same parental line were  
312 pooled and subsequently Wilson's 95% confidence interval was calculated using the R  
313 package "binom". Chloroplast DNA does not exhibit cytosine methylation, thus a region of  
314 chloroplast DNA was amplified, cloned, and sequenced to assess the bisulfite conversion  
315 efficiency (see also **Table S3** and **Table S4**).

## 316 **Kanamycin sensitivity phenotype analysis**

### 317 **a) Visual Assessment**

318 Kanamycin sensitivity in parental lines was analyzed by visual inspection. An  
319 experimenter unaware of the experimental design was asked to judge general viability of the  
320 seedlings using previously acquired images and rate the viability between 0 (dead) and 10  
321 (perfectly viable) (double-blind assay).

322

### 323 **b) Image Data Analysis**

324 Images were acquired from 14-day-old seedlings grown on kanamycin containing  
325 medium. The images were further processed and analyzed using the ImageJ image analysis  
326 software. The color images were split in red, green, and blue channels. All subsequent steps

327 were conducted in the green channel images. To extract the area covered by seedlings  
328 tissue, a grey threshold was set, which has been previously empirically defined and showed  
329 the best separation between seedling tissue and background (lower threshold 160, upper  
330 threshold 255). The total area and the mean grey value within the threshold were measured.  
331 The product between total area and mean grey value (area x mean; see **Table S6**) was used  
332 to perform statistical analysis. Assuming normal distribution of the data, we performed cross-  
333 wise t-tests between progeny classes (progeny classes derived from crosses with the wild  
334 type were omitted). The *p*-values were adjusted for multiple testing using the Benjamini-  
335 Hochberg (aka FDR) algorithm. Statistical testing was conducted using R.

### 336 **c) Statistical Analysis**

337 Correlation between viability on kanamycin (as well as *NPTII* expression) and *TIS-*  
338 *KNOT* IFs was performed using the R-base `cor.test()` function. The slope and intercept were  
339 retrieved by employing a linear model using the R-base `lm()` function. To assess whether the  
340 chromosomal position may affect transgene expression, the viability score of 99 transgenic  
341 lines inserted into chromosome 1 were assessed visually. Subsequently, the along the  
342 chromosome ordered viability scores were tested for randomness using a two-sided Bartels  
343 rank test.

344

## 345 **References**

346

- 347 Feng, S., Cokus, S.J., Schubert, V., Zhai, J., Pellegrini, M., and Jacobsen, S.E. (2014).  
348 Genome-wide Hi-C analyses in wild-type and mutants reveal high-resolution chromatin  
349 interactions in *Arabidopsis*. *Mol. Cell* 55, 694–707.
- 350 Grob, S., Schmid, M.W., Luedtke, N.W., Wicker, T., and Grossniklaus, U. (2013).  
351 Characterization of chromosomal architecture in *Arabidopsis* by chromosome conformation  
352 capture. *Genome Biol.* 14, R129.
- 353 Grob, S., Schmid, M.W., and Grossniklaus, U. (2014). Hi-C Analysis in *Arabidopsis* identifies  
354 the *KNOT*, a structure with similarities to the flamenco locus of *Drosophila*. *Mol. Cell* 55, 678–  
355 693.
- 356 Gruntman, E., Qi, Y., Slotkin, R.K., Roeder, T., Martienssen, R.A., and Sachidanandam, R.  
357 (2008). Kismeth: Analyzer of plant methylation states through bisulfite sequencing. *BMC*  
358 *Bioinformatics* 9, 314–371.
- 359 Henderson, I.R., Deleris, A., Wong, W., Zhong, X., Chin, H.G., Horwitz, G.A., Kelly, K.A.,  
360 Pradhan, S., and Jacobsen, S.E. (2010). The de novo cytosine methyltransferase DRM2  
361 requires intact UBA domains and a catalytically mutated paralog DRM3 during RNA-directed  
362 DNA methylation in *Arabidopsis thaliana*. *PLoS Genet.* 6, e1001182.
- 363 Jullien, P.E., Susaki, D., Yelagandula, R., Higashiyama, T., and Berger, F. (2012). DNA  
364 methylation dynamics during sexual reproduction in *Arabidopsis thaliana*. *Curr. Biol.* 22,  
365 1825–1830.



366 Langmead, B., Trapnell, C., Pop, M., and Salzberg, S.L. (2009). Ultrafast and memory-  
367 efficient alignment of short DNA sequences to the human genome. *Genome Biol.* 10, R25.

368 Liao, Y., Smyth, G.K., and Shi, W. (2013). The Subread aligner: fast, accurate and scalable  
369 read mapping by seed-and-vote. *Nucleic Acids Res.* 41, e108–e108.

370 Moissiard, G., Cokus, S.J., Cary, J., Feng, S., Billi, A.C., Stroud, H., Husmann, D., Zhan, Y.,  
371 Lajoie, B.R., McCord, R.P., et al. (2012). MORC family ATPases required for  
372 heterochromatin condensation and gene silencing. *Science.* 336, 1448–1451.

373 Quinlan, A.R., and Hall, I.M. (2010). BEDTools: A flexible suite of utilities for comparing  
374 genomic features. *Bioinformatics* 26, 841–842.

375 Robinson, M.D., McCarthy, D.J., and Smyth, G.K. (2010). edgeR: a Bioconductor package  
376 for differential expression analysis of digital gene expression data. *Bioinformatics* 26, 139–  
377 140.

378 Rohde, C., Zhang, Y., Reinhardt, R., and Jeltsch, A. (2010). BISMA--fast and accurate  
379 bisulfite sequencing data analysis of individual clones from unique and repetitive sequences.  
380 *BMC Bioinformatics* 11, 230.

381 Schmid, M.W., and Grossniklaus, U. (2015). Rcount: Simple and flexible RNA-Seq read  
382 counting. *Bioinformatics* 31, 436–437.

383 Schmid, M.W., Grob, S., and Grossniklaus, U. (2015). HiCdat: a fast and easy-to-use Hi-C  
384 data analysis tool. *BMC Bioinformatics* 16, 277.

385
